# Supplementary material for: Exploiting the “Lego brick” approach to predict accurate molecular structures of PAHs and PANHs
Source: Royal Society of Chemistry journal article supplement (doi:10.1039/d2cp03294e), 2022-01-01
Supplement: d2cp03294e2.pdf [file d2cp03294e2.pdf]

Exploiting the "Lego brick" approach to predict accurate  
molecular structures of PAHs and PANHs  
Supporting Information

Hexu Ye, Silvia Alessandrini, Mattia Melosso, Cristina puzzarini

July 18, 2022

Template molecules (from SE100 Database):  
Benzene + Benzonitrile

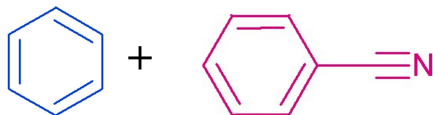

Target molecule (2-Cyanonaphthalene):  
Optimized at rev-DSDPBEP86-D3BJ/may-cc-pVTZ level

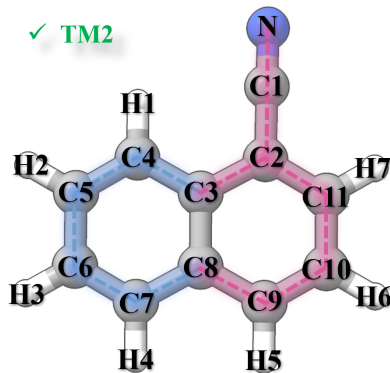

Figure S1: Graphical description of the TM approach for 2-cyanonaphthalene (TM2): benzene and benzonitrile as fragments

Table S1: Rotational constants (MHz) of 1- and 2-cyanonaphthalene from the TM2 approach (see Figure S1). The relative error with respect to the experimental value is reported in square brackets.

| Parameter          | $B_e$ TM2       | $B_e + \Delta B_{vib}$ TM2 |
|--------------------|-----------------|----------------------------|
| 1-Cyanonaphthalene |                 |                            |
| $A$                | 1488.188 [0.63] | 1480.361 [0.10]            |
| $B$                | 961.488 [0.49]  | 955.677 [-0.12]            |
| $C$                | 584.108 [0.54]  | 580.788 [-0.03]            |
| MAE                | 0.55            | 0.08                       |
| 2-Cyanonaphthalene |                 |                            |
| $A_0$              | 2722.999 [0.59] | 2704.594 [-0.09]           |
| $B_0$              | 609.386 [0.54]  | 606.363 [0.04]             |
| $C_0$              | 497.949 [0.54]  | 495.372 [0.02]             |
| MAE                | 0.56            | 0.05                       |

Table S2: Vibrational corrections (in MHz) for the molecules of the benchmark study and their contribution with respect to the experimental rotational constant (in percent).

|                          | $\Delta B_{vib}^{B3}$ | $\Delta B_{vib}^{B3}/B_0^{Exp}$ (%) |                                | $\Delta B_{vib}^{B3}$ | $\Delta B_{vib}^{B3}/B_0^{Exp}$ (%) |
|--------------------------|-----------------------|-------------------------------------|--------------------------------|-----------------------|-------------------------------------|
| Naphthalene              |                       |                                     | <i>cis</i> -1-Naphthol         |                       |                                     |
| $\Delta A$               | -23.486               | 0.75                                | $\Delta A$                     | -14.879               | 0.76                                |
| $\Delta B$               | -7.832                | 0.64                                | $\Delta B$                     | -6.300                | 0.56                                |
| $\Delta C$               | -5.751                | 0.65                                | $\Delta C$                     | -4.212                | 0.59                                |
| Anthracene               |                       |                                     | Quinoline                      |                       |                                     |
| $\Delta A$               | -16.475               | 0.77                                | $\Delta A$                     | -22.978               | 0.73                                |
| $\Delta B$               | -2.757                | 0.61                                | $\Delta B$                     | -8.015                | 0.63                                |
| $\Delta C$               | -2.277                | 0.61                                | $\Delta C$                     | -5.808                | 0.64                                |
| Phenanthrene             |                       |                                     | Isoquinoline                   |                       |                                     |
| $\Delta A$               | -11.197               | 0.70                                | $\Delta A$                     | -24.308               | 0.76                                |
| $\Delta B$               | -3.679                | 0.67                                | $\Delta B$                     | -7.581                | 0.61                                |
| $\Delta C$               | -2.635                | 0.64                                | $\Delta C$                     | -5.675                | 0.64                                |
| Pyrene                   |                       |                                     | Phenanthridine                 |                       |                                     |
| $\Delta A$               | -7.095                | 0.70                                | $\Delta A$                     | -11.003               | 0.67                                |
| $\Delta B$               | -3.440                | 0.62                                | $\Delta B$                     | -3.689                | 0.66                                |
| $\Delta C$               | -2.231                | 0.62                                | $\Delta C$                     | -2.629                | 0.63                                |
| 1-Cyanonaphthalene       |                       |                                     | 3-Cyanopyridine                |                       |                                     |
| $\Delta A$               | -7.827                | 0.53                                | $\Delta A$                     | -41.122               | 0.71                                |
| $\Delta B$               | -5.811                | 0.61                                | $\Delta B$                     | -6.037                | 0.38                                |
| $\Delta C$               | -3.320                | 0.57                                | $\Delta C$                     | -5.888                | 0.48                                |
| 2-Cyanonaphthalene       |                       |                                     | 2-Ethynylpyridine              |                       |                                     |
| $\Delta A$               | -18.405               | 0.68                                | $\Delta A$                     | -42.266               | 0.72                                |
| $\Delta B$               | -3.023                | 0.50                                | $\Delta B$                     | -6.097                | 0.39                                |
| $\Delta C$               | -2.577                | 0.52                                | $\Delta C$                     | -5.947                | 0.48                                |
| 9-Cyanoanthracene        |                       |                                     | <i>cis</i> -3-Hydroxy-pyridine |                       |                                     |
| $\Delta A$               | -5.205                | 0.53                                | $\Delta A$                     | -42.203               | 0.73                                |
| $\Delta B$               | -2.776                | 0.62                                | $\Delta B$                     | -17.719               | 0.66                                |
| $\Delta C$               | -1.756                | 0.57                                | $\Delta C$                     | -12.492               | 0.68                                |
| 9-Cyanophenanthrene      |                       |                                     | 4-Hydroxy-pyridine             |                       |                                     |
| $\Delta A$               | -5.115                | 0.60                                | $\Delta A$                     | -47.701               | 0.80                                |
| $\Delta B$               | -2.861                | 0.59                                | $\Delta B$                     | -15.979               | 0.61                                |
| $\Delta C$               | -1.761                | 0.57                                | $\Delta C$                     | -12.160               | 0.66                                |
| <i>trans</i> -2-Naphthol |                       |                                     | Benzoic acid                   |                       |                                     |
| $\Delta A$               | -22.428               | 0.79                                | $\Delta A$                     | -29.123               | 0.75                                |
| $\Delta B$               | -4.937                | 0.60                                | $\Delta B$                     | -7.856                | 0.64                                |
| $\Delta C$               | -3.930                | 0.61                                | $\Delta C$                     | -5.700                | 0.61                                |

Table S3: Comparison of computed equilibrium rotational constants with the experimental counterparts for naphthalene, anthracene, phenanthrene, pyrene, 9-cyanoanthracene, 9-cyanophenanthrene, *trans*-2-naphthol, *cis*-1-naphthol, phenanthridine, 3-cyanopyridine, 2-ethynylpyridine, *cis*-3-hydroxypyridine, 4-hydroxypyridine, and benzoic acid. All values in MHz.

|                              | $B_e$ revDSD    | $B_e$ TM         | $B_e$ TM+LR     | $\Delta B_{vib}$ |
|------------------------------|-----------------|------------------|-----------------|------------------|
| <b>Naphthalene</b>           |                 |                  |                 |                  |
| <i>A</i>                     | 3130.862 [0.37] | 3141.652 [0.71]  |                 | -23.486          |
| <i>B</i>                     | 1236.581 [0.29] | 1240.611 [0.62]  |                 | -7.832           |
| <i>C</i>                     | 886.460 [0.29]  | 889.396 [0.62]   |                 | -7.832           |
| MAE                          | 0.32            | 0.65             |                 |                  |
| <b>Anthracene</b>            |                 |                  |                 |                  |
| <i>A</i>                     | 2153.234 [0.33] | 2160.276 [0.65]  |                 | -16.457          |
| <i>B</i>                     | 453.659 [0.25]  | 455.133 [0.57]   |                 | -2.757           |
| <i>C</i>                     | 374.712 [0.18]  | 375.931 [0.51]   |                 | -2.277           |
| MAE                          | 0.25            | 0.58             |                 |                  |
| <b>Phenanthrene</b>          |                 |                  |                 |                  |
| <i>A</i>                     | 1620.349 [0.29] | 1625.745 [0.62]  |                 | -11.197          |
| <i>B</i>                     | 553.912 [0.30]  | 555.676 [0.62]   |                 | -3.679           |
| <i>C</i>                     | 412.798 [0.24]  | 414.128 [0.57]   |                 | -2.635           |
| MAE                          | 0.28            | 0.60             |                 |                  |
| <b>Pyrene</b>                |                 |                  |                 |                  |
| <i>A</i>                     | 1014.425 [0.33] | 1017.6849 [0.65] |                 | -7.095           |
| <i>B</i>                     | 558.034 [0.31]  | 559.827 [0.63]   |                 | -3.440           |
| <i>C</i>                     | 359.999 [0.29]  | 361.156 [0.61]   |                 | -2.231           |
| MAE                          | 0.31            | 0.63             |                 |                  |
| <b>9-Cyanoanthracene</b>     |                 |                  |                 |                  |
| <i>A</i>                     | 986.795 [0.10]  | 989.752 [0.40]   | 990.547 [0.48]  | -5.205           |
| <i>B</i>                     | 452.515 [0.29]  | 453.950 [0.61]   | 453.950 [0.61]  | -2.776           |
| <i>C</i>                     | 310.246 [0.20]  | 311.213 [0.52]   | 311.291 [0.54]  | -1.756           |
| MAE                          | 0.20            | 0.51             | 0.54            |                  |
| <b>9-Cyanophenanthrene</b>   |                 |                  |                 |                  |
| <i>A</i>                     | 847.626 [0.18]  | 850.289 [0.49]   | 850.621 [0.53]  | -5.114           |
| <i>B</i>                     | 487.474 [0.22]  | 488.977 [0.53]   | 489.109 [0.56]  | -2.861           |
| <i>C</i>                     | 309.487 [0.18]  | 310.448 [0.49]   | 310.545 [0.52]  | -1.761           |
| MAE                          | 0.19            | 0.50             | 0.54            |                  |
| <b><i>cis</i> 1-Naphthol</b> |                 |                  |                 |                  |
| <i>A</i>                     | 1953.905 [0.33] | 1959.411 [0.61]  | 1961.468 [0.72] | -14.879          |

|                                      |                  |                 |                 |         |
|--------------------------------------|------------------|-----------------|-----------------|---------|
| <i>B</i>                             | 1127.056 [0.24]  | 1130.586 [0.56] | 1130.796 [0.58] | -6.300  |
| <i>C</i>                             | 714.764 [0.23]   | 716.921 [0.54]  | 717.280 [0.59]  | -4.212  |
| MAE                                  | 0.27             | 0.57            | 0.63            |         |
| <b><i>trans</i> 2-Naphthol</b>       |                  |                 |                 |         |
| <i>A</i>                             | 2857.094 [0.41]  | 2866.643 [0.75] | 2867.191 [0.77] | -22.428 |
| <i>B</i>                             | 827.321 [0.22]   | 829.667 [0.50]  | 830.266 [0.57]  | -4.937  |
| <i>C</i>                             | 641.549 [0.23]   | 643.442 [0.52]  | 643.830 [0.58]  | -3.930  |
| MAE                                  | 0.29             | 0.59            | 0.64            |         |
| <b>Quinoline</b>                     |                  |                 |                 |         |
| <i>A</i>                             | 3156.993 [0.36]  | 3167.722 [0.71] |                 | -22.978 |
| <i>B</i>                             | 1275.015 [0.27]  | 1279.635 [0.63] |                 | -8.015  |
| <i>C</i>                             | 908.215 [0.27]   | 911.447 [0.63]  |                 | -5.808  |
| MAE                                  | 0.30             | 0.66            |                 |         |
| <b>Isoquinoline</b>                  |                  |                 |                 |         |
| <i>A</i>                             | 3211.062 [0.38]  | 3222.231 [0.73] |                 | -24.308 |
| <i>B</i>                             | 1241.346 [0.28]  | 1245.540 [0.61] |                 | -7.581  |
| <i>C</i>                             | 895.254 [0.28]   | 898.304 [0.62]  |                 | -5.675  |
| MAE                                  | 0.31             | 0.65            |                 |         |
| <b>Phenanthridine</b>                |                  |                 |                 |         |
| <i>A</i>                             | 1648.171 [0.35]  | 1653.563 [0.68] |                 | -11.003 |
| <i>B</i>                             | 559.106 [0.25]   | 561.008 [0.59]  |                 | -3.689  |
| <i>C</i>                             | 417.484 [0.23]   | 418.890 [0.57]  |                 | -2.629  |
| MAE                                  | 0.28             | 0.61            |                 |         |
| <b>3-Cyanopyridine</b>               |                  |                 |                 |         |
| <i>A</i>                             | 5847.865 [0.43]  | 5869.468 [0.80] | 5869.471 [0.80] | -41.122 |
| <i>B</i>                             | 1570.988 [-0.02] | 1575.581 [0.27] | 1577.336 [0.38] | -6.037  |
| <i>C</i>                             | 1238.322 [0.09]  | 1242.144 [0.40] | 1243.235 [0.49] | -5.888  |
| MAE                                  | 0.17             | 0.49            | 0.56            |         |
| <b>2-Ethynylpyridine</b>             |                  |                 |                 |         |
| <i>A</i>                             | 5882.858 [0.43]  | 5903.948 [0.79] | 5903.949 [0.79] | -42.266 |
| <i>B</i>                             | 1581.417 [-0.01] | 1585.529 [0.25] | 1587.260 [0.36] | -6.097  |
| <i>C</i>                             | 1246.370 [0.10]  | 1249.871 [0.38] | 1250.946 [0.47] | -5.947  |
| MAE                                  | 0.17             | 0.47            | 0.54            |         |
| <b><i>cis</i> 3-Hydroxy-pyridine</b> |                  |                 |                 |         |
| <i>A</i>                             | 5841.587 [0.42]  | 5861.085 [0.76] | 5861.083 [0.76] | -42.203 |
| <i>B</i>                             | 2695.546 [0.22]  | 2702.079 [0.46] | 2706.594 [0.63] | -17.719 |
| <i>C</i>                             | 1844.444 [0.27]  | 1849.447 [0.55] | 1851.561 [0.66] | -12.492 |
| MAE                                  | 0.30             | 0.59            | 0.68            |         |
| <b>4-Hydroxy-pyridine</b>            |                  |                 |                 |         |
| <i>A</i>                             | 6017.179 [0.45]  | 6038.088 [0.79] | 6038.090 [0.79] | -47.701 |
| <i>B</i>                             | 2637.092 [0.20]  | 2643.375 [0.44] | 2647.835 [0.61] | -15.979 |

|                                |                 |                 |                 |         |
|--------------------------------|-----------------|-----------------|-----------------|---------|
| <i>C</i>                       | 1833.529 [0.27] | 1838.507 [0.54] | 1840.664 [0.66] | -12.160 |
| MAE                            | 0.30            | 0.59            | 0.69            |         |
| <b><i>cis</i> Benzoic acid</b> |                 |                 |                 |         |
| <i>A</i>                       | 3884.367 [0.31] | 3901.433 [0.75] | 3901.435 [0.75] | -29.123 |
| <i>B</i>                       | 1229.556 [0.18] | 1232.632 [0.43] | 1234.188 [0.56] | -7.856  |
| <i>C</i>                       | 933.930 [0.15]  | 936.691 [0.44]  | 937.589 [0.54]  | -5.700  |
| MAE                            | 0.21            | 0.54            | 0.62            |         |

---



---

Table S4: Cartesian coordinates (revDSD/mayTZ and TM) of naphthalene, anthracene, phenanthrene, pyrene, 1-cyanonaphthalene, 2-cyanonaphthalene, 9-cyanoanthracene, 9-cyanophenanthrene, *trans* 2-naphthol, *cis* 1-naphthol, quinoline, isoquinoline, phenanthridine, 3-cyanopyridine, 2-ethynylpyridine, *cis* 3-hydroxy-pyridine, 4-hydroxy-pyridine, benzoic acid, 1-ethynyl-naphthalene, 2-ethynyl-naphthalene, 9-ethynylanthracene, 9-ethynylphenanthrene, 1-pyrenecarbonitrile, 2-pyrenecarbonitrile, 4-pyrenecarbonitrile, 1-ethynylpyrene, 2-ethynylpyrene, and 4-ethynylpyrene.

| revDSD/mayTZ       |          |           |           | TM |          |           |           |
|--------------------|----------|-----------|-----------|----|----------|-----------|-----------|
| <b>Naphthalene</b> |          |           |           |    |          |           |           |
| C                  | 0.000000 | 0.000000  | 0.712073  | C  | 0.000000 | 0.000000  | 0.7109500 |
| C                  | 0.000000 | 0.000000  | -0.712073 | C  | 0.000000 | 0.000000  | -0.710950 |
| C                  | 0.000000 | 1.241127  | 1.400008  | C  | 0.000000 | 1.239172  | 1.397809  |
| C                  | 0.000000 | -1.241127 | 1.400008  | C  | 0.000000 | -1.239172 | 1.397809  |
| C                  | 0.000000 | 1.241127  | -1.400008 | C  | 0.000000 | 1.239172  | -1.397809 |
| C                  | 0.000000 | -1.241127 | -1.400008 | C  | 0.000000 | -1.239172 | -1.397809 |
| C                  | 0.000000 | 2.427364  | 0.707757  | C  | 0.000000 | 2.423552  | 0.706645  |
| C                  | 0.000000 | -2.427364 | 0.707757  | C  | 0.000000 | -2.423552 | 0.706645  |
| C                  | 0.000000 | 2.427364  | -0.707757 | C  | 0.000000 | 2.423552  | -0.706645 |
| C                  | 0.000000 | -2.427364 | -0.707757 | C  | 0.000000 | -2.423552 | -0.706645 |
| H                  | 0.000000 | 1.237638  | 2.484723  | H  | 0.000000 | 1.235696  | 2.478903  |
| H                  | 0.000000 | -1.237638 | 2.484723  | H  | 0.000000 | -1.235696 | 2.478903  |
| H                  | 0.000000 | 1.237638  | -2.484723 | H  | 0.000000 | 1.235696  | -2.478903 |
| H                  | 0.000000 | -1.237638 | -2.484723 | H  | 0.000000 | -1.235696 | -2.478903 |
| H                  | 0.000000 | 3.369004  | 1.243693  | H  | 0.000000 | 3.362082  | 1.240821  |
| H                  | 0.000000 | -3.369004 | 1.243693  | H  | 0.000000 | -3.362082 | 1.240821  |
| H                  | 0.000000 | 3.369004  | -1.243693 | H  | 0.000000 | 3.362082  | -1.240821 |
| H                  | 0.000000 | -3.369004 | -1.243693 | H  | 0.000000 | -3.362082 | -1.240821 |
| <b>Anthracene</b>  |          |           |           |    |          |           |           |
| C                  | 0.000000 | 0.000000  | 1.401095  | C  | 0.000000 | 0.000000  | 1.398900  |
| C                  | 0.000000 | 0.000000  | -1.401095 | C  | 0.000000 | 0.000000  | -1.398900 |
| H                  | 0.000000 | 0.000000  | 2.487026  | H  | 0.000000 | 0.000000  | 2.483400  |
| H                  | 0.000000 | 0.000000  | -2.487026 | H  | 0.000000 | 0.000000  | -2.483400 |
| C                  | 0.000000 | 1.219468  | 0.718019  | C  | 0.000000 | 1.217507  | 0.716921  |
| C                  | 0.000000 | -1.219468 | 0.718019  | C  | 0.000000 | -1.217507 | 0.716921  |
| C                  | 0.000000 | 1.219468  | -0.718019 | C  | 0.000000 | 1.217507  | -0.716921 |
| C                  | 0.000000 | -1.219468 | -0.718019 | C  | 0.000000 | -1.217507 | -0.716921 |
| C                  | 0.000000 | 2.472096  | 1.404943  | C  | 0.000000 | 2.468194  | 1.402778  |
| C                  | 0.000000 | -2.472096 | 1.404943  | C  | 0.000000 | -2.468194 | 1.402778  |
| C                  | 0.000000 | 2.472096  | -1.404943 | C  | 0.000000 | 2.468194  | -1.402778 |
| C                  | 0.000000 | -2.472096 | -1.404943 | C  | 0.000000 | -2.468194 | -1.402778 |
| C                  | 0.000000 | 3.650422  | 0.712855  | C  | 0.000000 | 3.644585  | 0.711823  |
| C                  | 0.000000 | 3.650422  | -0.712855 | C  | 0.000000 | 3.644585  | -0.711823 |
| C                  | 0.000000 | -3.650422 | 0.712855  | C  | 0.000000 | -3.644585 | 0.711823  |
| C                  | 0.000000 | -3.650422 | -0.712855 | C  | 0.000000 | -3.644585 | -0.711823 |
| H                  | 0.000000 | 2.469376  | 2.489625  | H  | 0.000000 | 2.465484  | 2.483875  |
| H                  | 0.000000 | 2.469376  | -2.489625 | H  | 0.000000 | 2.465484  | -2.483875 |
| H                  | 0.000000 | -2.469376 | 2.489625  | H  | 0.000000 | -2.465484 | 2.483875  |

|                     |          |           |            |   |          |           |           |
|---------------------|----------|-----------|------------|---|----------|-----------|-----------|
| H                   | 0.000000 | -2.469376 | 0-2.489625 | H | 0.000000 | -2.465484 | -2.483875 |
| H                   | 0.000000 | 4.593846  | 1.245662   | H | 0.000000 | 4.584891  | 1.242868  |
| H                   | 0.000000 | 4.593846  | -1.245662  | H | 0.000000 | 4.584891  | -1.242868 |
| H                   | 0.000000 | -4.593846 | 01.245662  | H | 0.000000 | -4.584891 | 1.242868  |
| H                   | 0.000000 | -4.593846 | 0-1.245662 | H | 0.000000 | -4.584891 | -1.242868 |
| <b>Phenanthrene</b> |          |           |            |   |          |           |           |
| C                   | 0.000000 | 0.678585  | 2.087008   | C | 0.000000 | 0.725550  | -0.375579 |
| C                   | 0.000000 | -0.678585 | 2.087008   | C | 0.000000 | -0.725550 | -0.375579 |
| C                   | 0.000000 | 1.417347  | 0.858066   | C | 0.000000 | 1.415203  | 0.861124  |
| C                   | 0.000000 | -1.417347 | 0.858066   | C | 0.000000 | -1.415203 | 0.861124  |
| H                   | 0.000000 | 1.230540  | 3.0206700  | C | 0.000000 | 0.677555  | 2.088170  |
| H                   | 0.000000 | -1.230540 | 3.020670   | C | 0.000000 | -0.677555 | 2.088170  |
| C                   | 0.000000 | 0.726640  | -0.380583  | H | 0.000000 | 1.227661  | 3.018731  |
| C                   | 0.000000 | -0.726640 | -0.380583  | H | 0.000000 | -1.227661 | 3.018731  |
| C                   | 0.000000 | 2.829346  | 0.872510   | C | 0.000000 | 1.489058  | -1.561329 |
| C                   | 0.000000 | -2.829346 | 0.872510   | C | 0.000000 | -1.489058 | -1.561329 |
| C                   | 0.000000 | 3.550597  | -0.301469  | C | 0.000000 | 2.825029  | 0.875537  |
| C                   | 0.000000 | -3.550597 | -0.301469  | C | 0.000000 | -2.825029 | 0.875537  |
| C                   | 0.000000 | 2.871011  | -1.532284  | C | 0.000000 | 2.866492  | -1.525500 |
| C                   | 0.000000 | -2.871011 | -1.532284  | C | 0.000000 | -2.866492 | -1.525500 |
| C                   | 0.000000 | 1.491346  | -1.568186  | C | 0.000000 | 3.545041  | -0.296588 |
| C                   | 0.000000 | -1.491346 | -1.568186  | C | 0.000000 | -3.545041 | -0.296588 |
| H                   | 0.000000 | 3.339327  | 1.829859   | H | 0.000000 | 0.996357  | -2.520371 |
| H                   | 0.000000 | -3.339327 | 1.829859   | H | 0.000000 | -0.996357 | -2.520371 |
| H                   | 0.000000 | 4.633661  | -0.278396  | H | 0.000000 | 3.333334  | 1.829687  |
| H                   | 0.000000 | -4.633661 | -0.278396  | H | 0.000000 | -3.333334 | 1.829687  |
| H                   | 0.000000 | 3.431971  | -2.459245  | H | 0.000000 | 3.425566  | -2.449416 |
| H                   | 0.000000 | -3.431971 | -2.459245  | H | 0.000000 | -3.425566 | -2.449416 |
| H                   | 0.000000 | 0.997015  | -2.530381  | H | 0.000000 | 4.624498  | -0.273638 |
| H                   | 0.000000 | -0.997015 | -2.530381  | H | 0.000000 | -4.624498 | -0.273638 |
| <b>Pyrene</b>       |          |           |            |   |          |           |           |
| C                   | 0.000000 | 0.000000  | 0.712350   | C | 0.000000 | 0.711250  | 0.000005  |
| C                   | 0.000000 | 0.000000  | -0.712350  | C | 0.000000 | -0.711250 | 0.000005  |
| C                   | 0.000000 | 1.231000  | 1.424155   | C | 0.000000 | 1.421963  | -1.229108 |
| C                   | 0.000000 | 1.231000  | -1.424155  | C | 0.000000 | -1.421963 | -1.229108 |
| C                   | 0.000000 | -1.231000 | 1.424155   | C | 0.000000 | 1.421963  | 1.229118  |
| C                   | 0.000000 | -1.231000 | -1.424155  | C | 0.000000 | -1.421963 | 1.229118  |
| C                   | 0.000000 | 2.459233  | 0.679620   | C | 0.000000 | 0.678555  | -2.455480 |
| C                   | 0.000000 | 2.459233  | -0.679620  | C | 0.000000 | -0.678555 | -2.455480 |
| C                   | 0.000000 | -2.459233 | 0.679620   | C | 0.000000 | 0.678555  | 2.455490  |
| C                   | 0.000000 | -2.459233 | -0.679620  | C | 0.000000 | -0.678555 | 2.455490  |
| C                   | 0.000000 | 1.208589  | 2.824612   | C | 0.000000 | 2.820184  | -1.206733 |
| C                   | 0.000000 | 1.208589  | -2.824612  | C | 0.000000 | -2.820184 | -1.206733 |
| C                   | 0.000000 | -1.208589 | 2.824612   | C | 0.000000 | 2.820184  | 1.206743  |
| C                   | 0.000000 | -1.208589 | -2.824612  | C | 0.000000 | -2.820184 | 1.206743  |
| C                   | 0.000000 | 0.000000  | 3.514996   | C | 0.000000 | 3.509490  | -0.000033 |
| C                   | 0.000000 | 0.000000  | -3.514996  | C | 0.000000 | -3.509490 | -0.000033 |
| H                   | 0.000000 | 3.394957  | 1.228280   | H | 0.000000 | 1.225388  | -3.388085 |
| H                   | 0.000000 | 3.394957  | -1.228280  | H | 0.000000 | -1.225388 | -3.388085 |
| H                   | 0.000000 | -3.394957 | 1.228280   | H | 0.000000 | 1.225388  | 3.388095  |



|   |          |           |           |   |          |           |           |
|---|----------|-----------|-----------|---|----------|-----------|-----------|
| H | 0.000000 | -3.394957 | -1.228280 | H | 0.000000 | -1.225388 | 3.388095  |
| H | 0.000000 | 2.147000  | 3.368484  | H | 0.000000 | 3.362239  | -2.142007 |
| H | 0.000000 | 2.147000  | -3.368484 | H | 0.000000 | -3.362239 | -2.142007 |
| H | 0.000000 | -2.147000 | 3.368484  | H | 0.000000 | 3.362239  | 2.142017  |
| H | 0.000000 | -2.147000 | -3.368484 | H | 0.000000 | -3.362239 | 2.142017  |
| H | 0.000000 | 0.000000  | 4.598615  | H | 0.000000 | 4.589490  | -0.000033 |
| H | 0.000000 | 0.000000  | -4.598615 | H | 0.000000 | -4.589490 | -0.000033 |

**1-Cyanonaphthalene**

|   |           |           |          |   |            |            |           |
|---|-----------|-----------|----------|---|------------|------------|-----------|
| C | -0.062509 | -0.253560 | 0.000000 | C | 0.0000000  | 0.2725870  | 0.0000000 |
| C | -0.520322 | -1.594742 | 0.000000 | C | -0.3414350 | 1.6457750  | 0.0000000 |
| C | -1.866914 | -1.867527 | 0.000000 | C | -1.6577580 | 2.0315930  | 0.0000000 |
| C | -2.813441 | -0.816458 | 0.000000 | C | -2.6886990 | 1.0664670  | 0.0000000 |
| C | -2.394386 | 0.491000  | 0.000000 | C | -2.3829710 | -0.2698050 | 0.0000000 |
| C | -1.011483 | 0.807081  | 0.000000 | C | -1.0340640 | -0.7018220 | 0.0000000 |
| C | -0.555504 | 2.150054  | 0.000000 | C | -0.6945470 | -2.0766190 | 0.0000000 |
| C | 0.787254  | 2.441331  | 0.000000 | C | 0.6164630  | -2.4804620 | 0.0000000 |
| C | 1.738374  | 1.400655  | 0.000000 | C | 1.6510500  | -1.5260160 | 0.0000000 |
| C | 1.325127  | 0.083304  | 0.000000 | C | 1.3518950  | -0.1804710 | 0.0000000 |
| H | 0.204502  | -2.400361 | 0.000000 | H | 0.4467280  | 2.3842980  | 0.0000000 |
| H | -2.207938 | -2.895617 | 0.000000 | H | -1.9091750 | 3.0815100  | 0.0000000 |
| H | -3.871654 | -1.047812 | 0.000000 | H | -3.7199250 | 1.3860140  | 0.0000000 |
| H | -3.114706 | 1.301472  | 0.000000 | H | -3.1670640 | -1.0135190 | 0.0000000 |
| H | -1.289110 | 2.948710  | 0.000000 | H | -1.4907690 | -2.8074810 | 0.0000000 |
| H | 1.124099  | 3.470311  | 0.000000 | H | 0.8636940  | -3.5308590 | 0.0000000 |
| H | 2.797096  | 1.627364  | 0.000000 | H | 2.6831740  | -1.8409410 | 0.0000000 |
| C | 2.303749  | -0.965064 | 0.000000 | C | 2.4161470  | 0.7807840  | 0.0000000 |
| N | 3.088474  | -1.823919 | 0.000000 | N | 3.2681220  | 1.5669860  | 0.0000000 |

**2-Cyanonaphthalene**

|   |           |           |          |   |            |            |           |
|---|-----------|-----------|----------|---|------------|------------|-----------|
| C | -0.564940 | -0.588821 | 0.000000 | C | 0.7064340  | -0.3379940 | 0.0000000 |
| C | -1.589949 | -1.570216 | 0.000000 | C | 1.9185100  | -1.0718030 | 0.0000000 |
| C | -2.911340 | -1.197471 | 0.000000 | C | 1.9018040  | -2.4425010 | 0.0000000 |
| C | -3.267154 | 0.172524  | 0.000000 | C | 0.6732000  | -3.1408340 | 0.0000000 |
| C | -2.295288 | 1.143370  | 0.000000 | C | -0.5148490 | -2.4555950 | 0.0000000 |
| C | -0.922385 | 0.789881  | 0.000000 | C | -0.5300840 | -1.0401770 | 0.0000000 |
| C | 0.105449  | 1.769137  | 0.000000 | C | -1.7407360 | -0.3032500 | 0.0000000 |
| C | 1.426695  | 1.406078  | 0.000000 | C | -1.7333580 | 1.0646300  | 0.0000000 |
| C | 1.779837  | 0.029401  | 0.000000 | C | -0.4975540 | 1.7622210  | 0.0000000 |
| C | 0.804410  | -0.945794 | 0.000000 | C | 0.6948700  | 1.0751610  | 0.0000000 |
| H | -1.312172 | -2.618321 | 0.000000 | H | 2.8553880  | -0.5331250 | 0.0000000 |
| H | -3.688111 | -1.952391 | 0.000000 | H | 2.8294910  | -2.9947090 | 0.0000000 |
| H | -4.313458 | 0.453181  | 0.000000 | H | 0.6739480  | -4.2205330 | 0.0000000 |
| H | -2.566036 | 2.193343  | 0.000000 | H | -1.4553060 | -2.9879990 | 0.0000000 |
| H | -0.169738 | 2.817778  | 0.000000 | H | -2.6796860 | -0.8401220 | 0.0000000 |
| H | 2.209804  | 2.153332  | 0.000000 | H | -2.6562260 | 1.6254330  | 0.0000000 |
| H | 1.084663  | -1.992744 | 0.000000 | H | 1.6311760  | 1.6166310  | 0.0000000 |
| C | 3.165478  | -0.343364 | 0.000000 | C | -0.4975540 | 3.1971310  | 0.0000000 |
| N | 4.288615  | -0.645510 | 0.000000 | N | -0.4975540 | 4.3560710  | 0.0000000 |

**9-Cyanoanthracene**

|   |           |           |          |   |           |           |            |
|---|-----------|-----------|----------|---|-----------|-----------|------------|
| C | -1.788793 | -0.000001 | 0.000000 | C | 0.0000000 | 0.0000000 | -1.7860680 |
| C | 1.009133  | 0.000000  | 0.000000 | C | 0.0000000 | 0.0000000 | 1.0074320  |

|   |           |           |          |   |           |            |            |
|---|-----------|-----------|----------|---|-----------|------------|------------|
| C | -1.109737 | -1.221125 | 0.000000 | C | 0.0000000 | 1.2191730  | -1.1080980 |
| C | -1.109737 | 1.221123  | 0.000000 | C | 0.0000000 | -1.2191730 | -1.1080980 |
| C | 0.323687  | -1.231384 | 0.000000 | C | 0.0000000 | 1.2294560  | 0.3230580  |
| C | 0.323686  | 1.231382  | 0.000000 | C | 0.0000000 | -1.2294560 | 0.3230580  |
| C | -1.808613 | -2.466243 | 0.000000 | C | 0.0000000 | 2.4623990  | -1.8059580 |
| C | -1.808613 | 2.466242  | 0.000000 | C | 0.0000000 | -2.4623990 | -1.8059580 |
| C | 1.003438  | -2.485241 | 0.000000 | C | 0.0000000 | 2.4814340  | 1.0017430  |
| C | 1.003438  | 2.485239  | 0.000000 | C | 0.0000000 | -2.4814340 | 1.0017430  |
| C | -1.126164 | -3.649733 | 0.000000 | C | 0.0000000 | 3.6440400  | -1.1246200 |
| C | -1.126164 | 3.649732  | 0.000000 | C | 0.0000000 | -3.6440400 | -1.1246200 |
| C | 0.297689  | -3.656741 | 0.000000 | C | 0.0000000 | 3.6510630  | 0.2970740  |
| C | 0.297689  | 3.656740  | 0.000000 | C | 0.0000000 | -3.6510630 | 0.2970740  |
| H | -2.892835 | -2.451333 | 0.000000 | H | 0.0000000 | 2.4475080  | -2.8865560 |
| H | -2.892835 | 2.451332  | 0.000000 | H | 0.0000000 | -2.4475080 | -2.8865560 |
| H | 2.086973  | -2.495180 | 0.000000 | H | 0.0000000 | 2.4913710  | 2.0816970  |
| H | 2.086973  | 2.495179  | 0.000000 | H | 0.0000000 | -2.4913710 | 2.0816970  |
| H | -1.664888 | -4.589448 | 0.000000 | H | 0.0000000 | 4.5806300  | -1.6615880 |
| H | -1.664888 | 4.589447  | 0.000000 | H | 0.0000000 | -4.5806300 | -1.6615880 |
| H | 0.825622  | -4.602663 | 0.000000 | H | 0.0000000 | 4.5938800  | 0.8232370  |
| H | 0.825622  | 4.602662  | 0.000000 | H | 0.0000000 | -4.5938800 | 0.8232370  |
| H | -2.874568 | -0.000001 | 0.000000 | H | 0.0000000 | 0.0000000  | -2.8682680 |
| C | 2.440752  | 0.000001  | 0.000000 | C | 0.0000000 | 0.0000000  | 2.4390320  |
| N | 3.604952  | 0.000006  | 0.000000 | N | 0.0000000 | 0.0000000  | 3.5991320  |

**9-Cyanophenantrene**

|   |           |           |          |   |            |            |           |
|---|-----------|-----------|----------|---|------------|------------|-----------|
| N | -3.603860 | -2.315029 | 0.000000 | N | -3.5975020 | -2.3121500 | 0.0000000 |
| C | -2.568573 | -1.784213 | 0.000000 | C | -2.5662130 | -1.7826040 | 0.0000000 |
| C | -1.299006 | -1.117299 | 0.000000 | C | -1.2967210 | -1.1154960 | 0.0000000 |
| C | -0.152575 | -1.857132 | 0.000000 | C | -0.1521320 | -1.8540780 | 0.0000000 |
| C | 1.128785  | -1.227494 | 0.000000 | C | 1.1272220  | -1.2253460 | 0.0000000 |
| C | 1.219812  | 0.187470  | 0.000000 | C | 1.2180240  | 0.1874390  | 0.0000000 |
| C | 2.303121  | -2.012701 | 0.000000 | C | 2.2997990  | -2.0092940 | 0.0000000 |
| C | 3.545879  | -1.419799 | 0.000000 | C | 3.5405850  | -1.4172420 | 0.0000000 |
| C | 3.643687  | -0.016954 | 0.000000 | C | 3.6381660  | -0.0166370 | 0.0000000 |
| C | 2.507369  | 0.766558  | 0.000000 | C | 2.5035760  | 0.7655800  | 0.0000000 |
| C | 0.000000  | 0.977640  | 0.000000 | C | 0.0000000  | 0.9763610  | 0.0000000 |
| C | -1.258793 | 0.325467  | 0.000000 | C | -1.2566740 | 0.3250480  | 0.0000000 |
| C | -2.448359 | 1.084202  | 0.000000 | C | -2.4444950 | 1.0823570  | 0.0000000 |
| C | -2.402153 | 2.461433  | 0.000000 | C | -2.3985670 | 2.4573900  | 0.0000000 |
| C | -1.159666 | 3.117022  | 0.000000 | C | -1.1581620 | 3.1121280  | 0.0000000 |
| C | 0.012688  | 2.389695  | 0.000000 | C | 0.0124040  | 2.3861760  | 0.0000000 |
| H | -0.207403 | -2.939630 | 0.000000 | H | -0.2066820 | -2.9330000 | 0.0000000 |
| H | 2.207786  | -3.092881 | 0.000000 | H | 2.2048600  | -3.0859160 | 0.0000000 |
| H | 4.442436  | -2.027319 | 0.000000 | H | 4.4341770  | -2.0227140 | 0.0000000 |
| H | 4.618821  | 0.455082  | 0.000000 | H | 4.6100550  | 0.4538950  | 0.0000000 |
| H | 2.618885  | 1.842114  | 0.000000 | H | 2.6146630  | 1.8375400  | 0.0000000 |
| H | 0.954258  | 2.921360  | 0.000000 | H | 0.9507110  | 2.9162870  | 0.0000000 |
| H | -1.119321 | 4.199561  | 0.000000 | H | -1.1181460 | 4.1910860  | 0.0000000 |
| H | -3.320514 | 3.035420  | 0.000000 | H | -3.3139600 | 3.0293690  | 0.0000000 |
| H | -3.401226 | 0.568130  | 0.000000 | H | -3.3940400 | 0.5678040  | 0.0000000 |

**cis-1-Naphthol**

|                          |           |           |          |   |            |            |           |
|--------------------------|-----------|-----------|----------|---|------------|------------|-----------|
| C                        | 0.023977  | 0.434573  | 0.000000 | C | 0.0000000  | 0.4419110  | 0.0000000 |
| C                        | 1.034924  | 1.431004  | 0.000000 | C | 0.9909970  | 1.4551550  | 0.0000000 |
| C                        | 2.366284  | 1.090639  | 0.000000 | C | 2.3262520  | 1.1397520  | 0.0000000 |
| C                        | 2.753160  | -0.268611 | 0.000000 | C | 2.7373270  | -0.2100400 | 0.0000000 |
| C                        | 1.797398  | -1.254091 | 0.000000 | C | 1.8013090  | -1.2112470 | 0.0000000 |
| C                        | 0.413913  | -0.937825 | 0.000000 | C | 0.4143870  | -0.9208410 | 0.0000000 |
| C                        | -0.574753 | -1.952911 | 0.000000 | C | -0.5539730 | -1.9523150 | 0.0000000 |
| C                        | -1.906015 | -1.615568 | 0.000000 | C | -1.8890250 | -1.6399850 | 0.0000000 |
| C                        | -2.309229 | -0.264579 | 0.000000 | C | -2.3163200 | -0.2987030 | 0.0000000 |
| C                        | -1.369289 | 0.739384  | 0.000000 | C | -1.3964450 | 0.7207240  | 0.0000000 |
| H                        | 0.779348  | 2.486018  | 0.000000 | H | 0.7170460  | 2.5017970  | 0.0000000 |
| H                        | 3.121804  | 1.866824  | 0.000000 | H | 3.0649700  | 1.9270460  | 0.0000000 |
| H                        | 3.804739  | -0.528618 | 0.000000 | H | 3.7899400  | -0.4499170 | 0.0000000 |
| H                        | 2.087586  | -2.299064 | 0.000000 | H | 2.1095720  | -2.2472580 | 0.0000000 |
| H                        | -0.263697 | -2.990949 | 0.000000 | H | -0.2250170 | -2.9809970 | 0.0000000 |
| H                        | -2.663552 | -2.390107 | 0.000000 | H | -2.6297360 | -2.4256800 | 0.0000000 |
| H                        | -3.358041 | 0.003851  | 0.000000 | H | -3.3663640 | -0.0504100 | 0.0000000 |
| O                        | -1.826268 | 2.025987  | 0.000000 | O | -1.8757610 | 1.9954900  | 0.0000000 |
| H                        | -1.080637 | 2.631927  | 0.000000 | H | -1.1413810 | 2.6150250  | 0.0000000 |
| <i>trans</i> -2-Naphthol |           |           |          |   |            |            |           |
| C                        | -0.300635 | -0.617142 | 0.000000 | C | 0.0000000  | 0.6859080  | 0.0000000 |
| C                        | -1.409644 | -1.504310 | 0.000000 | C | -0.6414490 | 1.9505290  | 0.0000000 |
| C                        | -2.695455 | -1.021551 | 0.000000 | C | -2.0096290 | 2.0429820  | 0.0000000 |
| C                        | -2.940004 | 0.372817  | 0.000000 | C | -2.8080310 | 0.8766830  | 0.0000000 |
| C                        | -1.887424 | 1.254896  | 0.000000 | C | -2.2157990 | -0.3599160 | 0.0000000 |
| C                        | -0.548994 | 0.785792  | 0.000000 | C | -0.8053710 | -0.4865420 | 0.0000000 |
| C                        | 0.558678  | 1.669880  | 0.000000 | C | -0.1638950 | -1.7477850 | 0.0000000 |
| C                        | 1.844715  | 1.190528  | 0.000000 | C | 1.2030600  | -1.8434790 | 0.0000000 |
| C                        | 2.082677  | -0.205225 | 0.000000 | C | 1.9960860  | -0.6731560 | 0.0000000 |
| C                        | 1.033210  | -1.091615 | 0.000000 | C | 1.4084810  | 0.5660910  | 0.0000000 |
| H                        | -1.224463 | -2.572895 | 0.000000 | H | -0.0327360 | 2.8437330  | 0.0000000 |
| H                        | -3.531259 | -1.711230 | 0.000000 | H | -2.4834710 | 3.0134840  | 0.0000000 |
| H                        | -3.959129 | 0.740013  | 0.000000 | H | -3.8842050 | 0.9638630  | 0.0000000 |
| H                        | -2.066054 | 2.324928  | 0.000000 | H | -2.8191690 | -1.2570990 | 0.0000000 |
| H                        | 0.379595  | 2.739466  | 0.000000 | H | -0.7675620 | -2.6444060 | 0.0000000 |
| H                        | 2.685833  | 1.877010  | 0.000000 | H | 1.6830760  | -2.8132860 | 0.0000000 |
| H                        | 1.233907  | -2.156447 | 0.000000 | H | 2.0297950  | 1.4494760  | 0.0000000 |
| O                        | 3.355817  | -0.705603 | 0.000000 | O | 3.3587280  | -0.7443420 | 0.0000000 |
| H                        | 3.979656  | 0.026451  | 0.000000 | H | 3.6237200  | -1.6689170 | 0.0000000 |
| Quinoline                |           |           |          |   |            |            |           |
| N                        | -1.192516 | -1.396835 | 0.000000 | N | -1.132978  | 1.441459   | 0.000000  |
| C                        | -2.319464 | -0.717778 | 0.000000 | C | -2.284439  | 0.809461   | 0.000000  |
| C                        | -2.399956 | 0.696123  | 0.000000 | C | -2.421669  | -0.597965  | 0.000000  |
| C                        | -1.237347 | 1.422632  | 0.000000 | C | -1.291561  | -1.369214  | 0.000000  |
| C                        | 0.002498  | 0.739110  | 0.000000 | C | -0.027558  | -0.737432  | 0.000000  |
| C                        | 1.252562  | 1.408598  | 0.000000 | C | 1.192641   | -1.455685  | 0.000000  |
| C                        | 2.423534  | 0.691416  | 0.000000 | C | 2.389617   | -0.787392  | 0.000000  |
| C                        | 2.393848  | -0.724343 | 0.000000 | C | 2.416995   | 0.626243   | 0.000000  |
| C                        | 1.196741  | -1.397888 | 0.000000 | C | 1.249874   | 1.346360   | 0.000000  |
| C                        | -0.027241 | -0.683153 | 0.000000 | C | 0.000000   | 0.682579   | 0.000000  |

|   |           |           |          |   |           |           |          |
|---|-----------|-----------|----------|---|-----------|-----------|----------|
| H | -3.233204 | -1.305070 | 0.000000 | H | -3.171299 | 1.431394  | 0.000000 |
| H | -3.368806 | 1.179455  | 0.000000 | H | -3.406648 | -1.040685 | 0.000000 |
| H | -1.250961 | 2.507300  | 0.000000 | H | -1.348750 | -2.449701 | 0.000000 |
| H | 1.267580  | 2.493202  | 0.000000 | H | 1.164011  | -2.536406 | 0.000000 |
| H | 3.376227  | 1.207175  | 0.000000 | H | 3.317610  | -1.339281 | 0.000000 |
| H | 3.325669  | -1.277105 | 0.000000 | H | 3.367144  | 1.139258  | 0.000000 |
| H | 1.150362  | -2.479781 | 0.000000 | H | 1.247160  | 2.425656  | 0.000000 |

**Isoquinoline**

|   |           |           |          |   |           |           |          |
|---|-----------|-----------|----------|---|-----------|-----------|----------|
| N | -2.414706 | -0.700222 | 0.000000 | N | -2.416106 | 0.680115  | 0.000000 |
| C | -2.380146 | 0.662903  | 0.000000 | C | -2.370780 | -0.680530 | 0.000000 |
| C | -1.223277 | 1.399944  | 0.000000 | C | -1.209875 | -1.407237 | 0.000000 |
| C | 0.026447  | 0.732889  | 0.000000 | C | 0.032129  | -0.731560 | 0.000000 |
| C | 1.276159  | 1.402432  | 0.000000 | C | 1.285204  | -1.390141 | 0.000000 |
| C | 2.445656  | 0.681145  | 0.000000 | C | 2.447019  | -0.660743 | 0.000000 |
| C | 2.422554  | -0.735188 | 0.000000 | C | 2.412730  | 0.753141  | 0.000000 |
| C | 1.224738  | -1.407225 | 0.000000 | C | 1.211495  | 1.414578  | 0.000000 |
| C | 0.005586  | -0.685447 | 0.000000 | C | 0.000000  | 0.684255  | 0.000000 |
| C | -1.260530 | -1.329023 | 0.000000 | C | -1.269225 | 1.316770  | 0.000000 |
| H | -1.295788 | -2.416194 | 0.000000 | H | -1.312960 | 2.400588  | 0.000000 |
| H | -3.347246 | 1.152613  | 0.000000 | H | -3.331449 | -1.176624 | 0.000000 |
| H | -1.262696 | 2.483163  | 0.000000 | H | -1.240590 | -2.487100 | 0.000000 |
| H | 1.295596  | 2.486519  | 0.000000 | H | 1.313149  | -2.470479 | 0.000000 |
| H | 3.398374  | 1.197276  | 0.000000 | H | 3.400615  | -1.167535 | 0.000000 |
| H | 3.356006  | -1.284715 | 0.000000 | H | 3.338720  | 1.308189  | 0.000000 |
| H | 1.196682  | -2.491383 | 0.000000 | H | 1.174898  | 2.495459  | 0.000000 |

**Phenanthridine**

|   |           |           |          |   |           |           |          |
|---|-----------|-----------|----------|---|-----------|-----------|----------|
| N | -0.713313 | 2.050451  | 0.000000 | N | -2.156707 | -0.369919 | 0.000000 |
| C | 0.585033  | 2.026675  | 0.000000 | C | -1.509269 | -1.493073 | 0.000000 |
| C | 1.386942  | 0.835625  | 0.000000 | C | -0.081111 | -1.619015 | 0.000000 |
| C | 2.794775  | 0.908496  | 0.000000 | C | 0.534768  | -2.884617 | 0.000000 |
| C | 3.549843  | -0.244427 | 0.000000 | C | 1.906878  | -2.988015 | 0.000000 |
| C | 2.906765  | -1.496510 | 0.000000 | C | 2.690787  | -1.821552 | 0.000000 |
| C | 1.528892  | -1.583827 | 0.000000 | C | 2.102023  | -0.575220 | 0.000000 |
| C | 0.735528  | -0.416969 | 0.000000 | C | 0.699247  | -0.445079 | 0.000000 |
| C | -0.711698 | -0.415961 | 0.000000 | C | 0.000000  | 0.818896  | 0.000000 |
| C | -1.490727 | -1.592738 | 0.000000 | C | 0.652466  | 2.067836  | 0.000000 |
| C | -2.869233 | -1.530453 | 0.000000 | C | -0.067362 | 3.242529  | 0.000000 |
| C | -3.524608 | -0.285787 | 0.000000 | C | -1.471583 | 3.214507  | 0.000000 |
| C | -2.786158 | 0.878009  | 0.000000 | C | -2.132249 | 2.007374  | 0.000000 |
| C | -1.377065 | 0.834386  | 0.000000 | C | -1.413917 | 0.796863  | 0.000000 |
| H | 1.095105  | 2.988394  | 0.000000 | H | -2.102874 | -2.402007 | 0.000000 |
| H | 3.271316  | 1.882854  | 0.000000 | H | -0.085721 | -3.769926 | 0.000000 |
| H | 4.631603  | -0.191704 | 0.000000 | H | 2.382115  | -3.957166 | 0.000000 |
| H | 3.500020  | -2.403232 | 0.000000 | H | 3.767769  | -1.902232 | 0.000000 |
| H | 1.061816  | -2.559842 | 0.000000 | H | 2.728474  | 0.302565  | 0.000000 |
| H | -1.006638 | -2.560896 | 0.000000 | H | 1.730361  | 2.112005  | 0.000000 |
| H | -3.448537 | -2.445975 | 0.000000 | H | 0.452240  | 4.189092  | 0.000000 |
| H | -4.607068 | -0.244211 | 0.000000 | H | -2.029473 | 4.138905  | 0.000000 |
| H | -3.258213 | 1.852591  | 0.000000 | H | -3.210002 | 1.949604  | 0.000000 |

**3-Cyanopyridine**

|                               |           |           |          |   |            |            |           |
|-------------------------------|-----------|-----------|----------|---|------------|------------|-----------|
| N                             | 3.141555  | -0.024762 | 0.000000 | N | -0.0242040 | 3.1791660  | 0.0000000 |
| C                             | 1.979303  | 0.000002  | 0.000000 | C | -0.0242040 | 2.0207660  | 0.0000000 |
| C                             | 0.545888  | 0.030543  | 0.000000 | C | -0.0242040 | 0.5870660  | 0.0000000 |
| C                             | -0.182092 | -1.165321 | 0.000000 | C | 1.1850910  | -0.1141690 | 0.0000000 |
| N                             | -1.513814 | -1.209113 | 0.000000 | N | 1.2571350  | -1.4424170 | 0.0000000 |
| C                             | -2.167851 | -0.041826 | 0.000000 | C | 0.1059730  | -2.1200510 | 0.0000000 |
| C                             | -1.535829 | 1.200176  | 0.000000 | C | -1.1468360 | -1.5158400 | 0.0000000 |
| C                             | -0.149014 | 1.242333  | 0.000000 | C | -1.2184110 | -0.1328910 | 0.0000000 |
| H                             | 0.339903  | -2.115833 | 0.000000 | H | 2.1216140  | 0.4265240  | 0.0000000 |
| H                             | -3.250537 | -0.104955 | 0.000000 | H | 0.1919050  | -3.1981320 | 0.0000000 |
| H                             | -2.120899 | 2.110406  | 0.000000 | H | -2.0419920 | -2.1186420 | 0.0000000 |
| H                             | 0.389630  | 2.181347  | 0.000000 | H | -2.1664940 | 0.3837240  | 0.0000000 |
| <b>2-Ethynylpyridine</b>      |           |           |          |   |            |            |           |
| H                             | 4.237816  | 0.023002  | 0.000000 | H | 0.0105600  | 4.2562540  | 0.0000000 |
| C                             | 3.174260  | 0.019201  | 0.000000 | C | 0.0105600  | 3.1945540  | 0.0000000 |
| C                             | 1.964525  | 0.014878  | 0.000000 | C | 0.0105600  | 1.9878540  | 0.0000000 |
| C                             | 0.527718  | 0.009743  | 0.000000 | C | 0.0105600  | 0.5510540  | 0.0000000 |
| N                             | -0.080767 | -1.189276 | 0.000000 | N | 1.2054760  | -0.0606760 | 0.0000000 |
| C                             | -1.415715 | -1.194804 | 0.000000 | C | 1.2061970  | -1.3933760 | 0.0000000 |
| C                             | -2.200151 | -0.043201 | 0.000000 | C | 0.0535340  | -2.1725320 | 0.0000000 |
| C                             | -1.560010 | 1.191668  | 0.000000 | C | -1.1766570 | -1.5293140 | 0.0000000 |
| C                             | -0.171447 | 1.222428  | 0.000000 | C | -1.2023810 | -0.1433520 | 0.0000000 |
| H                             | -1.881721 | -2.174603 | 0.000000 | H | 2.1815930  | -1.8616980 | 0.0000000 |
| H                             | -3.279912 | -0.118971 | 0.000000 | H | 0.1252220  | -3.2497490 | 0.0000000 |
| H                             | -2.129383 | 2.113118  | 0.000000 | H | -2.0977190 | -2.0940330 | 0.0000000 |
| H                             | 0.375003  | 2.156387  | 0.000000 | H | -2.1322200 | 0.4046320  | 0.0000000 |
| <b>cis-3-Hydroxy-pyridine</b> |           |           |          |   |            |            |           |
| H                             | 2.601159  | -0.883748 | 0.000000 | H | -0.892080  | 2.600597   | 0.000000  |
| O                             | 2.278443  | 0.023415  | 0.000000 | O | 0.011874   | 2.278872   | 0.000000  |
| C                             | 0.914566  | 0.011772  | 0.000000 | C | 0.000000   | 0.918424   | 0.000000  |
| C                             | 0.167978  | -1.167343 | 0.000000 | C | -1.177483  | 0.173189   | 0.000000  |
| N                             | -1.166375 | -1.192847 | 0.000000 | N | -1.203180  | -1.158963  | 0.000000  |
| C                             | -1.807957 | -0.020627 | 0.000000 | C | -0.033013  | -1.799692  | 0.000000  |
| C                             | -1.147368 | 1.206439  | 0.000000 | C | 1.192344   | -1.140321  | 0.000000  |
| C                             | 0.241165  | 1.229351  | 0.000000 | C | 1.215448   | 0.245587   | 0.000000  |
| H                             | 0.674053  | -2.130676 | 0.000000 | H | -2.138118  | 0.678006   | 0.000000  |
| H                             | -2.891010 | -0.066089 | 0.000000 | H | -0.078565  | -2.879732  | 0.000000  |
| H                             | -1.713323 | 2.129490  | 0.000000 | H | 2.112959   | -1.705006  | 0.000000  |
| H                             | 0.801967  | 2.155479  | 0.000000 | H | 2.139293   | 0.804777   | 0.000000  |
| <b>4-Hydroxy-pyridine</b>     |           |           |          |   |            |            |           |
| H                             | 2.650271  | 0.838734  | 0.000000 | H | -0.844613  | 2.632095   | 0.000000  |
| O                             | 2.294952  | -0.056153 | 0.000000 | O | 0.049366   | 2.283885   | 0.000000  |
| C                             | 0.938039  | 0.002139  | 0.000000 | C | 0.000000   | 0.929985   | 0.000000  |
| C                             | 0.224207  | 1.198418  | 0.000000 | C | -1.189351  | 0.209808   | 0.000000  |
| C                             | -1.165866 | 1.135939  | 0.000000 | C | -1.117973  | -1.177758  | 0.000000  |
| N                             | -1.869011 | -0.000235 | 0.000000 | N | 0.020892   | -1.872411  | 0.000000  |
| C                             | -1.158465 | -1.136303 | 0.000000 | C | 1.150499   | -1.155684  | 0.000000  |
| C                             | 0.228744  | -1.196637 | 0.000000 | C | 1.201766   | 0.229767   | 0.000000  |
| H                             | 0.731625  | 2.156874  | 0.000000 | H | -2.148611  | 0.709703   | 0.000000  |
| H                             | -1.742337 | 2.055270  | 0.000000 | H | -2.031004  | -1.758545  | 0.000000  |

|                                |            |            |           |   |            |            |           |
|--------------------------------|------------|------------|-----------|---|------------|------------|-----------|
| H                              | -1.733841  | -2.056071  | 0.000000  | H | 2.071416   | -1.723504  | 0.000000  |
| H                              | 0.753549   | -2.142684  | 0.000000  | H | 2.141987   | 0.759334   | 0.000000  |
| <b><i>cis</i> Benzoic acid</b> |            |            |           |   |            |            |           |
| C                              | -2.605297  | 0.025106   | 0.000000  | C | 0.2617890  | -2.5887200 | 0.0000000 |
| C                              | -1.929109  | -1.194933  | 0.000000  | C | 1.3980960  | -1.7834750 | 0.0000000 |
| C                              | -1.890237  | 1.221404   | 0.000000  | C | -1.0040060 | -2.0107620 | 0.0000000 |
| C                              | -0.539539  | -1.218709  | 0.000000  | C | 1.2688060  | -0.4019110 | 0.0000000 |
| C                              | -0.498687  | 1.202931   | 0.000000  | C | -1.1387770 | -0.6278140 | 0.0000000 |
| C                              | 0.177902   | -0.019662  | 0.000000  | C | 0.0000000  | 0.1781200  | 0.0000000 |
| C                              | 1.661054   | -0.097189  | 0.000000  | C | -0.0863820 | 1.6608050  | 0.0000000 |
| O                              | 2.300734   | -1.124242  | 0.000000  | O | 0.8605720  | 2.4071230  | 0.0000000 |
| O                              | 2.253444   | 1.121334   | 0.000000  | O | -1.3590990 | 2.1140090  | 0.0000000 |
| H                              | 3.205826   | 0.950077   | 0.000000  | H | -1.2940800 | 3.0758140  | 0.0000000 |
| H                              | 0.006773   | -2.153131  | 0.000000  | H | 2.1344440  | 0.2418900  | 0.0000000 |
| H                              | 0.062884   | 2.127204   | 0.000000  | H | -2.1160470 | -0.1730460 | 0.0000000 |
| H                              | -2.485588  | -2.124050  | 0.000000  | H | 2.3795860  | -2.2326760 | 0.0000000 |
| H                              | -2.416410  | 2.168063   | 0.000000  | H | -1.8840150 | -2.6359860 | 0.0000000 |
| H                              | -3.688620  | 0.043076   | 0.000000  | H | 0.3629710  | -3.6638690 | 0.0000000 |
| <b>1-Ethynyl-naphthalene</b>   |            |            |           |   |            |            |           |
| C                              | -0.0470670 | -0.2562760 | 0.0000000 | C | 0.2017980  | 0.1634480  | 0.0000000 |
| C                              | -0.4966010 | -1.6006390 | 0.0000000 | C | 1.4554400  | 0.8203010  | 0.0000000 |
| C                              | -1.8402620 | -1.8888830 | 0.0000000 | C | 2.6221150  | 0.0983230  | 0.0000000 |
| C                              | -2.7973110 | -0.8476720 | 0.0000000 | C | 2.5908190  | -1.3133300 | 0.0000000 |
| C                              | -2.3886920 | 0.4631920  | 0.0000000 | C | 1.3898180  | -1.9743630 | 0.0000000 |
| C                              | -1.0087980 | 0.7936360  | 0.0000000 | C | 0.1677870  | -1.2576500 | 0.0000000 |
| C                              | -0.5705350 | 2.1423620  | 0.0000000 | C | -1.0807790 | -1.9253750 | 0.0000000 |
| C                              | 0.7698250  | 2.4427510  | 0.0000000 | C | -2.2534640 | -1.2143570 | 0.0000000 |
| C                              | 1.7305520  | 1.4106510  | 0.0000000 | C | -2.2310520 | 0.1932640  | 0.0000000 |
| C                              | 1.3434690  | 0.0830090  | 0.0000000 | C | -1.0339430 | 0.8812050  | 0.0000000 |
| H                              | 0.2383440  | -2.3961370 | 0.0000000 | H | 1.4766140  | 1.8994940  | 0.0000000 |
| H                              | -2.1707650 | -2.9206880 | 0.0000000 | H | 3.5721330  | 0.6115810  | 0.0000000 |
| H                              | -3.8536810 | -1.0881970 | 0.0000000 | H | 3.5160840  | -1.8699740 | 0.0000000 |
| H                              | -3.1164930 | 1.2672930  | 0.0000000 | H | 1.3575640  | -3.0548820 | 0.0000000 |
| H                              | -1.3125610 | 2.9332890  | 0.0000000 | H | -1.0937600 | -3.0061970 | 0.0000000 |
| H                              | 1.0982220  | 3.4749770  | 0.0000000 | H | -3.2023180 | -1.7293450 | 0.0000000 |
| H                              | 2.7863540  | 1.6517420  | 0.0000000 | H | -3.1562960 | 0.7491670  | 0.0000000 |
| C                              | 2.3346020  | -0.9483340 | 0.0000000 | C | -1.0339430 | 2.3116050  | 0.0000000 |
| C                              | 3.1740250  | -1.8218120 | 0.0000000 | C | -1.0339430 | 3.5200050  | 0.0000000 |
| H                              | 3.9110220  | -2.5887080 | 0.0000000 | H | -1.0339430 | 4.5817050  | 0.0000000 |
| <b>2-Ethynyl-naphthalene</b>   |            |            |           |   |            |            |           |
| C                              | -0.5482090 | -0.5892230 | 0.0000000 | C | 0.7039260  | -0.3597450 | 0.0000000 |
| C                              | -1.5735570 | -1.5706980 | 0.0000000 | C | 1.9126010  | -1.0997200 | 0.0000000 |
| C                              | -2.8962140 | -1.2008340 | 0.0000000 | C | 1.8923450  | -2.4707700 | 0.0000000 |
| C                              | -3.2550340 | 0.1682710  | 0.0000000 | C | 0.6619920  | -3.1658110 | 0.0000000 |
| C                              | -2.2831400 | 1.1395240  | 0.0000000 | C | -0.5231110 | -2.4748930 | 0.0000000 |
| C                              | -0.9097940 | 0.7880420  | 0.0000000 | C | -0.5335110 | -1.0595310 | 0.0000000 |
| C                              | 0.1192920  | 1.7657670  | 0.0000000 | C | -1.7395240 | -0.3150370 | 0.0000000 |
| C                              | 1.4399110  | 1.4000710  | 0.0000000 | C | -1.7228140 | 1.0529610  | 0.0000000 |
| C                              | 1.8068890  | 0.0242630  | 0.0000000 | C | -0.4880460 | 1.7576430  | 0.0000000 |
| C                              | 0.8222040  | -0.9442120 | 0.0000000 | C | 0.6976380  | 1.0537110  | 0.0000000 |

|   |            |            |           |              |            |            |           |
|---|------------|------------|-----------|--------------|------------|------------|-----------|
| H | -1.2946410 | -2.6187410 | 0.0000000 | H            | 2.8516980  | -0.5645180 | 0.0000000 |
| H | -3.6713340 | -1.9577480 | 0.0000000 | H            | 2.8188430  | -3.0253600 | 0.0000000 |
| H | -4.3017790 | 0.4477220  | 0.0000000 | H            | 0.6587670  | -4.2456060 | 0.0000000 |
| H | -2.5547850 | 2.1895430  | 0.0000000 | H            | -1.4659900 | -3.0036080 | 0.0000000 |
| H | -0.1548980 | 2.8150520  | 0.0000000 | H            | -2.6810070 | -0.8460310 | 0.0000000 |
| H | 2.2213700  | 2.1496180  | 0.0000000 | H -2.6438110 | 1.6154880  | 0.0000000  |           |
| H | 1.0995580  | -1.9922530 | 0.0000000 | H            | 1.6371160  | 1.5874350  | 0.0000000 |
| C | 3.1905030  | -0.3407410 | 0.0000000 | C            | -0.4880460 | 3.1885430  | 0.0000000 |
| C | 4.3615010  | -0.6496560 | 0.0000000 | C            | -0.4880460 | 4.3966430  | 0.0000000 |
| H | 5.3898530  | -0.9209410 | 0.0000000 | H            | -0.4880460 | 5.4582430  | 0.0000000 |

**2-Quinolinecarbonitrile**

|   |           |           |           |   |            |            |           |
|---|-----------|-----------|-----------|---|------------|------------|-----------|
| N | 0.801391  | -0.914744 | 0.0000000 | N | 0.6511790  | 1.0244080  | 0.0000000 |
| C | 1.699929  | 0.051151  | 0.0000000 | C | -0.5266920 | 1.6135680  | 0.0000000 |
| C | 1.398450  | 1.436639  | 0.0000000 | C | -1.7693470 | 0.9351160  | 0.0000000 |
| C | 0.080182  | 1.811497  | 0.0000000 | C | -1.7578030 | -0.4326350 | 0.0000000 |
| C | -0.925236 | 0.816409  | 0.0000000 | C | -0.5221970 | -1.1158180 | 0.0000000 |
| C | -2.309940 | 1.119056  | 0.0000000 | C | -0.4227850 | -2.5275220 | 0.0000000 |
| C | -3.238131 | 0.107421  | 0.0000000 | C | 0.8073000  | -3.1322610 | 0.0000000 |
| C | -2.823606 | -1.247454 | 0.0000000 | C | 1.9887860  | -2.3541430 | 0.0000000 |
| C | -1.489508 | -1.570612 | 0.0000000 | C | 1.9232570  | -0.9852110 | 0.0000000 |
| C | -0.509643 | -0.545806 | 0.0000000 | C | 0.6659070  | -0.3346120 | 0.0000000 |
| H | 2.202156  | 2.160917  | 0.0000000 | H | -2.6882620 | 1.5008480  | 0.0000000 |
| H | -0.200252 | 2.858827  | 0.0000000 | H | -2.6813530 | -0.9952010 | 0.0000000 |
| H | -2.621631 | 2.157605  | 0.0000000 | H | -1.3284910 | -3.1171050 | 0.0000000 |
| H | -4.295534 | 0.342338  | 0.0000000 | H | 0.8794420  | -4.2094480 | 0.0000000 |
| H | -3.569961 | -2.032456 | 0.0000000 | H | 2.9490240  | -2.8475810 | 0.0000000 |
| H | -1.148350 | -2.598049 | 0.0000000 | H | 2.8100750  | -0.3705600 | 0.0000000 |
| C | 3.087470  | -0.356097 | 0.0000000 | C | -0.5266920 | 3.0596680  | 0.0000000 |
| N | 4.202464  | -0.683351 | 0.0000000 | N | -0.5266920 | 4.2175680  | 0.0000000 |

**3-Quinolinecarbonitrile**

|   |           |           |           |   |            |            |           |
|---|-----------|-----------|-----------|---|------------|------------|-----------|
| N | 0.088163  | 1.732503  | 0.0000000 | N | -1.7063540 | -0.2968190 | 0.0000000 |
| C | 1.342644  | 1.353973  | 0.0000000 | C | -1.6144380 | 1.0081480  | 0.0000000 |
| C | 1.756980  | -0.008926 | 0.0000000 | C | -0.3785520 | 1.7122840  | 0.0000000 |
| C | 0.799045  | -0.997978 | 0.0000000 | C | 0.7953710  | 0.9979100  | 0.0000000 |
| C | -0.562919 | -0.627546 | 0.0000000 | C | 0.7350740  | -0.4095990 | 0.0000000 |
| C | -1.614238 | -1.579437 | 0.0000000 | C | 1.8938730  | -1.2233820 | 0.0000000 |
| C | -2.921702 | -1.161304 | 0.0000000 | C | 1.7750930  | -2.5887250 | 0.0000000 |
| C | -3.231005 | 0.220649  | 0.0000000 | C | 0.4976340  | -3.1947060 | 0.0000000 |
| C | -2.231353 | 1.163284  | 0.0000000 | C | -0.6407230 | -2.4292130 | 0.0000000 |
| C | -0.874167 | 0.761260  | 0.0000000 | C | -0.5485840 | -1.0189200 | 0.0000000 |
| H | 2.096765  | 2.134661  | 0.0000000 | H | -2.5399200 | 1.5696550  | 0.0000000 |
| H | 1.082282  | -2.044308 | 0.0000000 | H | 1.7508190  | 1.5039860  | 0.0000000 |
| H | -1.368465 | -2.635496 | 0.0000000 | H | 2.8663210  | -0.7519410 | 0.0000000 |
| H | -3.723897 | -1.888989 | 0.0000000 | H | 2.6590860  | -3.2083020 | 0.0000000 |
| H | -4.268071 | 0.533618  | 0.0000000 | H | 0.4217540  | -4.2717360 | 0.0000000 |
| H | -2.445945 | 2.224417  | 0.0000000 | H | -1.6249390 | -2.8714340 | 0.0000000 |
| C | 3.154207  | -0.325405 | 0.0000000 | C | -0.3785520 | 3.1448840  | 0.0000000 |
| N | 4.288371  | -0.582299 | 0.0000000 | N | -0.3785520 | 4.3036840  | 0.0000000 |

**4-Quinolinecarbonitrile**

|   |           |          |           |   |            |            |           |
|---|-----------|----------|-----------|---|------------|------------|-----------|
| N | -0.667313 | 2.091185 | 0.0000000 | N | -0.9420630 | -1.9787400 | 0.0000000 |
|---|-----------|----------|-----------|---|------------|------------|-----------|

|   |           |           |          |   |            |            |           |
|---|-----------|-----------|----------|---|------------|------------|-----------|
| C | 0.611918  | 2.399115  | 0.000000 | C | 0.2819350  | -2.4555770 | 0.0000000 |
| C | 1.657831  | 1.449323  | 0.000000 | C | 1.4446350  | -1.6567010 | 0.0000000 |
| C | 1.331593  | 0.111386  | 0.000000 | C | 1.3020720  | -0.2896140 | 0.0000000 |
| C | -0.037779 | -0.277128 | 0.000000 | C | 0.0000000  | 0.2789650  | 0.0000000 |
| C | -0.464215 | -1.627519 | 0.000000 | C | -0.2400620 | 1.6723360  | 0.0000000 |
| C | -1.805824 | -1.922052 | 0.000000 | C | -1.5276680 | 2.1443620  | 0.0000000 |
| C | -2.770098 | -0.885817 | 0.000000 | C | -2.6211890 | 1.2490250  | 0.0000000 |
| C | -2.379788 | 0.430673  | 0.000000 | C | -2.4123250 | -0.1058710 | 0.0000000 |
| C | -1.003643 | 0.767892  | 0.000000 | C | -1.0962400 | -0.6248090 | 0.0000000 |
| H | 0.854787  | 3.457000  | 0.000000 | H | 0.3796490  | -3.5335570 | 0.0000000 |
| H | 2.691364  | 1.769776  | 0.000000 | H | 2.4230000  | -2.1124320 | 0.0000000 |
| H | 0.277527  | -2.417764 | 0.000000 | H | 0.5986580  | 2.3530570  | 0.0000000 |
| H | -2.130434 | -2.955341 | 0.000000 | H | -1.7093560 | 3.2084630  | 0.0000000 |
| H | -3.823556 | -1.137885 | 0.000000 | H | -3.6276810 | 1.6395500  | 0.0000000 |
| H | -3.097347 | 1.241290  | 0.000000 | H | -3.2299290 | -0.8099770 | 0.0000000 |
| C | 2.360509  | -0.888933 | 0.000000 | C | 2.4564630  | 0.5627980  | 0.0000000 |
| N | 3.185511  | -1.708412 | 0.000000 | N | 3.3811430  | 1.2610480  | 0.0000000 |

**9-Ethynylanthracene**

|   |           |           |          |   |            |            |           |
|---|-----------|-----------|----------|---|------------|------------|-----------|
| C | 0.000012  | -1.813481 | 0.000000 | C | 1.8012600  | 0.0000050  | 0.0000000 |
| C | 0.000000  | 1.002111  | 0.000000 | C | -1.0099400 | 0.0000050  | 0.0000000 |
| C | -1.218687 | -1.131042 | 0.000000 | C | 1.1198710  | -1.2168020 | 0.0000000 |
| C | 1.218705  | -1.131032 | 0.000000 | C | 1.1198710  | 1.2168120  | 0.0000000 |
| C | -1.227524 | 0.302810  | 0.000000 | C | -0.3106690 | -1.2274890 | 0.0000000 |
| C | 1.227530  | 0.302820  | 0.000000 | C | -0.3106690 | 1.2274990  | 0.0000000 |
| C | -2.463908 | -1.830486 | 0.000000 | C | 1.8198580  | -2.4591760 | 0.0000000 |
| C | 2.463932  | -1.830465 | 0.000000 | C | 1.8198580  | 2.4591860  | 0.0000000 |
| C | -2.484764 | 0.977302  | 0.000000 | C | -0.9824580 | -2.4836340 | 0.0000000 |
| C | 2.484764  | 0.977323  | 0.000000 | C | -0.9824580 | 2.4836440  | 0.0000000 |
| C | -3.649212 | -1.151101 | 0.000000 | C | 1.1431230  | -3.6434590 | 0.0000000 |
| C | 3.649230  | -1.151070 | 0.000000 | C | 1.1431230  | 3.6434690  | 0.0000000 |
| C | -3.657127 | 0.272534  | 0.000000 | C | -0.2772930 | -3.6531980 | 0.0000000 |
| C | 3.657133  | 0.272565  | 0.000000 | C | -0.2772930 | 3.6532080  | 0.0000000 |
| H | -2.447254 | -2.914910 | 0.000000 | H | 2.9007080  | -2.4411580 | 0.0000000 |
| H | 2.447287  | -2.914889 | 0.000000 | H | 2.9007080  | 2.4411680  | 0.0000000 |
| H | -2.492220 | 2.060062  | 0.000000 | H | -2.0616220 | -2.4924880 | 0.0000000 |
| H | 2.492211  | 2.060084  | 0.000000 | H | -2.0616220 | 2.4924980  | 0.0000000 |
| H | -4.587922 | -1.691991 | 0.000000 | H | 1.6834480  | -4.5783480 | 0.0000000 |
| H | 4.587945  | -1.691952 | 0.000000 | H | 1.6834480  | 4.5783580  | 0.0000000 |
| H | -4.603421 | 0.800283  | 0.000000 | H | -0.8020570 | -4.5970230 | 0.0000000 |
| H | 4.603422  | 0.800322  | 0.000000 | H | -0.8020570 | 4.5970330  | 0.0000000 |
| H | -0.000023 | -2.899271 | 0.000000 | H | 2.8834600  | -0.0000330 | 0.0000000 |
| C | -0.000028 | 2.430234  | 0.000000 | C | -2.4380400 | -0.0000200 | 0.0000000 |
| C | -0.000052 | 3.642569  | 0.000000 | C | -3.6473400 | -0.0000410 | 0.0000000 |
| H | -0.000072 | 4.706359  | 0.000000 | H | -4.7092400 | -0.0000600 | 0.0000000 |

**9-Ethynylphenanthrene**

|   |           |          |          |   |           |           |           |
|---|-----------|----------|----------|---|-----------|-----------|-----------|
| H | -3.893430 | 3.704398 | 0.000000 | H | 0.3793340 | 5.3684560 | 0.0000000 |
| C | -3.073445 | 3.026877 | 0.000000 | C | 0.3793340 | 4.3066560 | 0.0000000 |
| C | -2.139518 | 2.255211 | 0.000000 | C | 0.3793340 | 3.0981560 | 0.0000000 |
| C | -1.036948 | 1.344201 | 0.000000 | C | 0.3793340 | 1.6679560 | 0.0000000 |
| C | 0.242523  | 1.823811 | 0.000000 | C | 1.5621210 | 0.9882080 | 0.0000000 |



|   |           |           |          |   |            |            |           |
|---|-----------|-----------|----------|---|------------|------------|-----------|
| C | 1.370864  | 0.948653  | 0.000000 | C | 1.6061100  | -0.4369130 | 0.0000000 |
| C | 1.176880  | -0.455302 | 0.000000 | C | 0.4021150  | -1.1804870 | 0.0000000 |
| C | 2.680691  | 1.478592  | 0.000000 | C | 2.8470370  | -1.1080750 | 0.0000000 |
| C | 3.778780  | 0.647242  | 0.000000 | C | 2.9054830  | -2.4819330 | 0.0000000 |
| C | 3.592574  | -0.746599 | 0.000000 | C | 1.7142530  | -3.2250250 | 0.0000000 |
| C | 2.320659  | -1.283067 | 0.000000 | C | 0.4925080  | -2.5872350 | 0.0000000 |
| C | -0.178572 | -0.978701 | 0.000000 | C | -0.8628230 | -0.4700270 | 0.0000000 |
| C | -1.278127 | -0.082740 | 0.000000 | C | -0.8724250 | 0.9460680  | 0.0000000 |
| C | -2.594662 | -0.590852 | 0.000000 | C | -2.1007680 | 1.6363260  | 0.0000000 |
| C | -2.828907 | -1.949099 | 0.000000 | C | -3.2951680 | 0.9529090  | 0.0000000 |
| C | -1.745136 | -2.842654 | 0.000000 | C | -3.2937610 | -0.4494900 | 0.0000000 |
| C | -0.450995 | -2.364588 | 0.000000 | C | -2.1028550 | -1.1415710 | 0.0000000 |
| H | 0.412338  | 2.894556  | 0.000000 | H | 2.4925940  | 1.5374810  | 0.0000000 |
| H | 2.805931  | 2.555890  | 0.000000 | H | 3.7543170  | -0.5203650 | 0.0000000 |
| H | 4.779407  | 1.062092  | 0.000000 | H | 3.8594470  | -2.9873930 | 0.0000000 |
| H | 4.452240  | -1.406027 | 0.000000 | H | 1.7533340  | -4.3042170 | 0.0000000 |
| H | 2.212011  | -2.359112 | 0.000000 | H | -0.4032210 | -3.1868500 | 0.0000000 |
| H | 0.364865  | -3.074472 | 0.000000 | H | -2.1304710 | -2.2191170 | 0.0000000 |
| H | -1.923200 | -3.911368 | 0.000000 | H | -4.2279180 | -0.9910790 | 0.0000000 |
| H | -3.844650 | -2.325583 | 0.000000 | H | -4.2292670 | 1.4943980  | 0.0000000 |
| H | -3.420688 | 0.109336  | 0.000000 | H | -2.0871210 | 2.7155400  | 0.0000000 |

#### 1-Pyrenecarbonitrile

|   |           |           |          |   |            |            |           |
|---|-----------|-----------|----------|---|------------|------------|-----------|
| C | 1.029776  | -1.886346 | 0.000000 | C | 0.8763140  | 1.9860410  | 0.0000000 |
| C | -0.233074 | -2.390592 | 0.000000 | C | 2.0350330  | 1.2786170  | 0.0000000 |
| C | -1.381645 | -1.531323 | 0.000000 | C | 2.0357330  | -0.1535830 | 0.0000000 |
| C | -2.688510 | -2.035537 | 0.000000 | C | 3.2208550  | -0.8962590 | 0.0000000 |
| C | -3.781201 | -1.173803 | 0.000000 | C | 3.1861330  | -2.2852250 | 0.0000000 |
| C | -3.593213 | 0.205230  | 0.000000 | C | 1.9715380  | -2.9603160 | 0.0000000 |
| C | -2.302932 | 0.750106  | 0.000000 | C | 0.7638830  | -2.2552700 | 0.0000000 |
| C | -2.074721 | 2.166896  | 0.000000 | C | -0.5050420 | -2.9208770 | 0.0000000 |
| C | -0.814638 | 2.677491  | 0.000000 | C | -1.6671800 | -2.2194710 | 0.0000000 |
| C | 0.333910  | 1.817978  | 0.000000 | C | -1.6676800 | -0.7871710 | 0.0000000 |
| C | 1.639840  | 2.328430  | 0.000000 | C | -2.8571610 | -0.0490290 | 0.0000000 |
| C | 2.733572  | 1.477311  | 0.000000 | C | -2.8315630 | 1.3344340  | 0.0000000 |
| C | 2.549631  | 0.089756  | 0.000000 | C | -1.6125840 | 2.0178780  | 0.0000000 |
| C | 1.255633  | -0.469913 | 0.000000 | C | -0.3908980 | 1.3187220  | 0.0000000 |
| C | -1.182247 | -0.124450 | 0.000000 | C | 0.7920640  | -0.8362220 | 0.0000000 |
| C | 0.138486  | 0.409134  | 0.000000 | C | -0.4248160 | -0.1001670 | 0.0000000 |
| H | 1.886613  | -2.549855 | 0.000000 | H | 0.8937510  | 3.0660000  | 0.0000000 |
| H | -0.390357 | -3.463600 | 0.000000 | H | 2.9850360  | 1.7942120  | 0.0000000 |
| H | -2.840696 | -3.109236 | 0.000000 | H | 4.1683210  | -0.3762250 | 0.0000000 |
| H | -4.785801 | -1.579424 | 0.000000 | H | 4.1099110  | -2.8443330 | 0.0000000 |
| H | -4.448509 | 0.871971  | 0.000000 | H | 1.9506180  | -4.0410140 | 0.0000000 |
| H | -2.934202 | 2.828395  | 0.000000 | H | -0.5192860 | -4.0017830 | 0.0000000 |
| H | -0.656040 | 3.750186  | 0.000000 | H | -2.6177330 | -2.7338410 | 0.0000000 |
| H | 1.790513  | 3.401884  | 0.000000 | H | -3.8035680 | -0.5701600 | 0.0000000 |
| H | 3.740196  | 1.876279  | 0.000000 | H | -3.7512400 | 1.8991180  | 0.0000000 |
| C | 3.696383  | -0.769052 | 0.000000 | C | -1.6125840 | 3.4505780  | 0.0000000 |
| N | 4.627933  | -1.466695 | 0.000000 | N | -1.6125840 | 4.6102780  | 0.0000000 |

#### 2-Pyrenecarbonitrile

|   |           |           |          |   |            |            |           |
|---|-----------|-----------|----------|---|------------|------------|-----------|
| C | 2.891554  | 0.000001  | 0.000000 | C | 2.9294240  | 0.0000110  | 0.0000000 |
| C | 2.202537  | 1.215873  | 0.000000 | C | 2.2415060  | 1.2139430  | 0.0000000 |
| C | 2.202537  | -1.215872 | 0.000000 | C | 2.2415060  | -1.2139220 | 0.0000000 |
| C | 0.805187  | 1.232416  | 0.000000 | C | 0.8464040  | 1.2304570  | 0.0000000 |
| C | 0.805187  | -1.232415 | 0.000000 | C | 0.8464040  | -1.2304360 | 0.0000000 |
| C | 0.062791  | 2.462143  | 0.000000 | C | 0.1051680  | 2.4582590  | 0.0000000 |
| C | 0.062792  | -2.462143 | 0.000000 | C | 0.1051680  | -2.4582380 | 0.0000000 |
| C | -1.296020 | 2.459927  | 0.000000 | C | -1.2514310 | 2.4560450  | 0.0000000 |
| C | -1.296019 | -2.459927 | 0.000000 | C | -1.2514310 | -2.4560240 | 0.0000000 |
| C | -2.039721 | 1.231290  | 0.000000 | C | -1.9939970 | 1.2292810  | 0.0000000 |
| C | -2.039721 | -1.231290 | 0.000000 | C | -1.9939970 | -1.2292600 | 0.0000000 |
| C | -3.439806 | 1.208837  | 0.000000 | C | -3.3919170 | 1.2068620  | 0.0000000 |
| C | -3.439805 | -1.208838 | 0.000000 | C | -3.3919170 | -1.2068410 | 0.0000000 |
| C | -4.129779 | -0.000001 | 0.000000 | C | -4.0808060 | -0.0000760 | 0.0000000 |
| C | 0.094517  | 0.000000  | 0.000000 | C | 0.1368550  | -0.0000210 | 0.0000000 |
| C | -1.328886 | 0.000000  | 0.000000 | C | -1.2842830 | -0.0000640 | 0.0000000 |
| H | 2.755820  | 2.147571  | 0.000000 | H | 2.7929530  | 2.1425470  | 0.0000000 |
| H | 2.755820  | -2.147570 | 0.000000 | H | 2.7929530  | -2.1425260 | 0.0000000 |
| H | 0.611977  | 3.397055  | 0.000000 | H | 0.6525390  | 3.3900840  | 0.0000000 |
| H | 0.611978  | -3.397054 | 0.000000 | H | 0.6525390  | -3.3900630 | 0.0000000 |
| H | -1.845104 | 3.395159  | 0.000000 | H | -1.7986910 | 3.3881670  | 0.0000000 |
| H | -1.845103 | -3.395159 | 0.000000 | H | -1.7986910 | -3.3881460 | 0.0000000 |
| H | -3.983986 | 2.146848  | 0.000000 | H | -3.9342740 | 2.1417290  | 0.0000000 |
| H | -3.983986 | -2.146849 | 0.000000 | H | -3.9342740 | -2.1417080 | 0.0000000 |
| H | -5.213219 | 0.000000  | 0.000000 | H | -5.1606060 | -0.0000760 | 0.0000000 |
| C | 4.327205  | 0.000000  | 0.000000 | C | 4.3651240  | 0.0000110  | 0.0000000 |
| N | 5.490259  | -0.000001 | 0.000000 | N | 5.5241240  | 0.0000110  | 0.0000000 |

#### 4-Pyrenecarbonitrile

|   |           |           |          |   |            |            |           |
|---|-----------|-----------|----------|---|------------|------------|-----------|
| C | 1.642847  | -1.219931 | 0.000000 | C | 1.8790120  | -0.8853750 | 0.0000000 |
| C | 0.588237  | -2.088835 | 0.000000 | C | 1.0155410  | -1.9416570 | 0.0000000 |
| C | -0.760715 | -1.614052 | 0.000000 | C | -0.3979700 | -1.7394610 | 0.0000000 |
| C | -1.851353 | -2.493735 | 0.000000 | C | -1.2946400 | -2.8133250 | 0.0000000 |
| C | -3.152483 | -2.002194 | 0.000000 | C | -2.6645120 | -2.5854220 | 0.0000000 |
| C | -3.388883 | -0.630261 | 0.000000 | C | -3.1632390 | -1.2879740 | 0.0000000 |
| C | -2.326037 | 0.282280  | 0.000000 | C | -2.3002210 | -0.1873920 | 0.0000000 |
| C | -2.538431 | 1.702345  | 0.000000 | C | -2.7848410 | 1.1619180  | 0.0000000 |
| C | -1.491370 | 2.568382  | 0.000000 | C | -1.9282440 | 2.2138710  | 0.0000000 |
| C | -0.134596 | 2.097775  | 0.000000 | C | -0.5078820 | 2.0172930  | 0.0000000 |
| C | 0.956129  | 2.976012  | 0.000000 | C | 0.3891740  | 3.0897920  | 0.0000000 |
| C | 2.259165  | 2.489745  | 0.000000 | C | 1.7598540  | 2.8674300  | 0.0000000 |
| C | 2.505608  | 1.119721  | 0.000000 | C | 2.2680290  | 1.5738680  | 0.0000000 |
| C | 1.441416  | 0.211370  | 0.000000 | C | 1.4028780  | 0.4771250  | 0.0000000 |
| C | -0.993048 | -0.211246 | 0.000000 | C | -0.8987170 | -0.4110030 | 0.0000000 |
| C | 0.105213  | 0.696031  | 0.000000 | C | 0.0000000  | 0.6913320  | 0.0000000 |
| H | 0.770936  | -3.157339 | 0.000000 | H | 1.4018830  | -2.9506190 | 0.0000000 |
| H | -1.669894 | -3.562754 | 0.000000 | H | -0.9094070 | -3.8230320 | 0.0000000 |
| H | -3.988002 | -2.691743 | 0.000000 | H | -3.3471720 | -3.4219190 | 0.0000000 |
| H | -4.406200 | -0.254392 | 0.000000 | H | -4.2307470 | -1.1183500 | 0.0000000 |
| H | -3.557834 | 2.072220  | 0.000000 | H | -3.8532260 | 1.3252640  | 0.0000000 |
| H | -1.664582 | 3.638943  | 0.000000 | H | -2.3057280 | 3.2267140  | 0.0000000 |

|   |          |           |          |   |           |            |           |
|---|----------|-----------|----------|---|-----------|------------|-----------|
| H | 0.773370 | 4.044946  | 0.000000 | H | 0.0026890 | 4.0991280  | 0.0000000 |
| H | 3.092311 | 3.182071  | 0.000000 | H | 2.4396930 | 3.7062220  | 0.0000000 |
| H | 3.523781 | 0.748495  | 0.000000 | H | 3.3354640 | 1.4089510  | 0.0000000 |
| C | 2.981968 | -1.732826 | 0.000000 | C | 3.2924860 | -1.1271290 | 0.0000000 |
| N | 4.074668 | -2.132309 | 0.000000 | N | 4.4380440 | -1.3051000 | 0.0000000 |

**1-Ethynylpyrene**

|   |           |           |          |   |            |            |           |
|---|-----------|-----------|----------|---|------------|------------|-----------|
| C | 1.687439  | -1.358507 | 0.000000 | C | 0.8895790  | 1.9645240  | 0.0000000 |
| C | 0.703223  | -2.304440 | 0.000000 | C | 2.0445260  | 1.2507680  | 0.0000000 |
| C | -0.686796 | -1.940425 | 0.000000 | C | 2.0363520  | -0.1814080 | 0.0000000 |
| C | -1.715130 | -2.900107 | 0.000000 | C | 3.2164890  | -0.9321670 | 0.0000000 |
| C | -3.055197 | -2.509187 | 0.000000 | C | 3.1726560  | -2.3207760 | 0.0000000 |
| C | -3.398206 | -1.155778 | 0.000000 | C | 1.9533200  | -2.9872640 | 0.0000000 |
| C | -2.403304 | -0.161744 | 0.000000 | C | 0.7501450  | -2.2742060 | 0.0000000 |
| C | -2.722376 | 1.240180  | 0.000000 | C | -0.5227040 | -2.9324950 | 0.0000000 |
| C | -1.741080 | 2.188867  | 0.000000 | C | -1.6796690 | -2.2225890 | 0.0000000 |
| C | -0.351474 | 1.824161  | 0.000000 | C | -1.6709210 | -0.7905160 | 0.0000000 |
| C | 0.674935  | 2.786981  | 0.000000 | C | -2.8534090 | -0.0423420 | 0.0000000 |
| C | 2.011093  | 2.406103  | 0.000000 | C | -2.8167740 | 1.3409730  | 0.0000000 |
| C | 2.379401  | 1.046399  | 0.000000 | C | -1.5978370 | 2.0291820  | 0.0000000 |
| C | 1.372880  | 0.043080  | 0.000000 | C | -0.3844630 | 1.3099930  | 0.0000000 |
| C | -1.028371 | -0.553303 | 0.000000 | C | 0.7870370  | -0.8547140 | 0.0000000 |
| C | 0.000000  | 0.438764  | 0.000000 | C | -0.4253510 | -0.1092640 | 0.0000000 |
| H | 2.737819  | -1.651457 | 0.000000 | H | 0.9108850  | 3.0437130  | 0.0000000 |
| H | 0.962039  | -3.365862 | 0.000000 | H | 2.9982560  | 1.7598630  | 0.0000000 |
| H | -1.451962 | -3.960282 | 0.000000 | H | 4.1674790  | -0.4181840 | 0.0000000 |
| H | -3.841022 | -3.267301 | 0.000000 | H | 4.0927280  | -2.8863430 | 0.0000000 |
| H | -4.448482 | -0.855525 | 0.000000 | H | 1.9247580  | -4.0678870 | 0.0000000 |
| H | -3.774852 | 1.533207  | 0.000000 | H | -0.5434750 | -4.0132950 | 0.0000000 |
| H | -1.997926 | 3.250690  | 0.000000 | H | -2.6339400 | -2.7304540 | 0.0000000 |
| H | 0.411201  | 3.846779  | 0.000000 | H | -3.8041510 | -0.5563640 | 0.0000000 |
| H | 2.797771  | 3.161686  | 0.000000 | H | -3.7345020 | 1.9093890  | 0.0000000 |
| C | 3.763525  | 0.694293  | 0.000000 | C | -1.5978370 | 3.4582820  | 0.0000000 |
| C | 4.945630  | 0.406597  | 0.000000 | C | -1.5978370 | 4.6659820  | 0.0000000 |
| H | 5.988274  | 0.156462  | 0.000000 | H | -1.5978370 | 5.7277820  | 0.0000000 |

**2-Ethynylpyrene**

|   |           |           |          |   |            |            |           |
|---|-----------|-----------|----------|---|------------|------------|-----------|
| C | 2.920119  | -0.000121 | 0.000000 | C | -2.9295540 | 0.0000360  | 0.0000000 |
| C | 2.219002  | 1.211430  | 0.000000 | C | -2.2294970 | -1.2095950 | 0.0000000 |
| C | 2.218926  | -1.211627 | 0.000000 | C | -2.2294970 | 1.2096670  | 0.0000000 |
| C | 0.821587  | 1.230166  | 0.000000 | C | -0.8343220 | -1.2282600 | 0.0000000 |
| C | 0.821510  | -1.230276 | 0.000000 | C | -0.8343220 | 1.2283320  | 0.0000000 |
| C | 0.078386  | 2.459767  | 0.000000 | C | -0.0922000 | -2.4559950 | 0.0000000 |
| C | 0.078231  | -2.459830 | 0.000000 | C | -0.0922000 | 2.4560670  | 0.0000000 |
| C | -1.280724 | 2.459346  | 0.000000 | C | 1.2647000  | -2.4555330 | 0.0000000 |
| C | -1.280878 | -2.459324 | 0.000000 | C | 1.2647000  | 2.4556050  | 0.0000000 |
| C | -2.025957 | 1.231388  | 0.000000 | C | 2.0087570  | -1.2294380 | 0.0000000 |
| C | -2.026035 | -1.231319 | 0.000000 | C | 2.0087570  | 1.2295100  | 0.0000000 |
| C | -3.426187 | 1.208925  | 0.000000 | C | 3.4067770  | -1.2069760 | 0.0000000 |
| C | -3.426263 | -1.208769 | 0.000000 | C | 3.4067770  | 1.2070480  | 0.0000000 |
| C | -4.116414 | 0.000099  | 0.000000 | C | 4.0958810  | -0.0000460 | 0.0000000 |
| C | 0.108511  | -0.000035 | 0.000000 | C | -0.1224020 | 0.0000380  | 0.0000000 |

|   |           |           |          |   |            |            |           |
|---|-----------|-----------|----------|---|------------|------------|-----------|
| C | -1.314832 | 0.000011  | 0.000000 | C | 1.2986750  | 0.0000400  | 0.0000000 |
| H | 2.769738  | 2.145072  | 0.000000 | H | -2.7783860 | -2.1401780 | 0.0000000 |
| H | 2.769603  | -2.145304 | 0.000000 | H | -2.7783860 | 2.1402500  | 0.0000000 |
| H | 0.627849  | 3.394791  | 0.000000 | H | -0.6397980 | -3.3879180 | 0.0000000 |
| H | 0.627636  | -3.394889 | 0.000000 | H | -0.6397980 | 3.3879900  | 0.0000000 |
| H | -1.828968 | 3.395245  | 0.000000 | H | 1.8111790  | -3.3883450 | 0.0000000 |
| H | -1.829181 | -3.395189 | 0.000000 | H | 1.8111790  | 3.3884170  | 0.0000000 |
| H | -3.970313 | 2.147126  | 0.000000 | H | 3.9491300  | -2.1420770 | 0.0000000 |
| H | -3.970447 | -2.146936 | 0.000000 | H | 3.9491300  | 2.1421480  | 0.0000000 |
| H | -5.199975 | 0.000150  | 0.000000 | H | 5.1758810  | -0.0000740 | 0.0000000 |
| C | 4.351852  | 0.000015  | 0.000000 | C | -4.3612540 | -0.0001510 | 0.0000000 |
| C | 5.562839  | 0.000129  | 0.000000 | C | -5.5681540 | -0.0003090 | 0.0000000 |
| H | 6.626419  | 0.000230  | 0.000000 | H | -6.6298540 | -0.0004480 | 0.0000000 |

#### 4-Ethynylpyrene

|   |           |           |          |   |            |            |           |
|---|-----------|-----------|----------|---|------------|------------|-----------|
| C | 1.668048  | -1.228273 | 0.000000 | C | 0.5503060  | 2.0039180  | 0.0000000 |
| C | 0.604471  | -2.089297 | 0.000000 | C | 1.7335400  | 1.3209390  | 0.0000000 |
| C | -0.745861 | -1.617823 | 0.000000 | C | 1.7775730  | -0.1064820 | 0.0000000 |
| C | -1.836180 | -2.498466 | 0.000000 | C | 2.9886790  | -0.8073820 | 0.0000000 |
| C | -3.139006 | -2.010424 | 0.000000 | C | 3.0002400  | -2.1963340 | 0.0000000 |
| C | -3.379921 | -0.639343 | 0.000000 | C | 1.8085990  | -2.9117460 | 0.0000000 |
| C | -2.317887 | 0.274306  | 0.000000 | C | 0.5767810  | -2.2489760 | 0.0000000 |
| C | -2.531794 | 1.694041  | 0.000000 | C | -0.6699640 | -2.9566750 | 0.0000000 |
| C | -1.485314 | 2.560920  | 0.000000 | C | -1.8525190 | -2.2916940 | 0.0000000 |
| C | -0.127821 | 2.092070  | 0.000000 | C | -1.9015360 | -0.8585320 | 0.0000000 |
| C | 0.960085  | 2.973739  | 0.000000 | C | -3.1127510 | -0.1602200 | 0.0000000 |
| C | 2.263382  | 2.488783  | 0.000000 | C | -3.1273600 | 1.2281040  | 0.0000000 |
| C | 2.510699  | 1.118728  | 0.000000 | C | -1.9389800 | 1.9491130  | 0.0000000 |
| C | 1.451161  | 0.204503  | 0.000000 | C | -0.7075900 | 1.2889270  | 0.0000000 |
| C | -0.983938 | -0.216520 | 0.000000 | C | 0.5567130  | -0.8301040 | 0.0000000 |
| C | 0.114584  | 0.690250  | 0.000000 | C | -0.6817720 | -0.1307190 | 0.0000000 |
| H | 0.784751  | -3.158444 | 0.000000 | H | 2.6638030  | 1.8707640  | 0.0000000 |
| H | -1.652779 | -3.567323 | 0.000000 | H | 3.9176230  | -0.2547440 | 0.0000000 |
| H | -3.972522 | -2.702730 | 0.000000 | H | 3.9422260  | -2.7243930 | 0.0000000 |
| H | -4.398026 | -0.265409 | 0.000000 | H | 1.8245580  | -3.9926280 | 0.0000000 |
| H | -3.551634 | 2.063189  | 0.000000 | H | -0.6489490 | -4.0374700 | 0.0000000 |
| H | -1.659563 | 3.631489  | 0.000000 | H | -2.7863460 | -2.8364370 | 0.0000000 |
| H | 0.774528  | 4.042338  | 0.000000 | H | -4.0406690 | -0.7147730 | 0.0000000 |
| H | 3.095802  | 3.182436  | 0.000000 | H | -4.0701930 | 1.7546490  | 0.0000000 |
| H | 3.527625  | 0.746167  | 0.000000 | H | -1.9558000 | 3.0283820  | 0.0000000 |
| C | 3.002999  | -1.740888 | 0.000000 | C | 0.5503060  | 3.4339180  | 0.0000000 |
| C | 4.133954  | -2.175168 | 0.000000 | C | 0.5503060  | 4.6412180  | 0.0000000 |
| H | 5.126957  | -2.556476 | 0.000000 | H | 0.5503060  | 5.7030180  | 0.0000000 |

Table S5: Cartesian coordinates (TM+LR) of 1-cyanonaphthalene, 2-cyanonaphthalene, 9-cyanoanthracene, 9-cyanophenanthrene, 3-cyanopyridine, 2-ethynylpyridine, *cis*-Benzoic acid, 1-ethynyl-naphthalene, 2-ethynyl-naphthalene, 2-quinolinecarbonitrile, 3-quinolinecarbonitrile, 4-quinolinecarbonitrile, 9-ethynylanthracene, 9-ethynylphenanthrene, 1-pyrenecarbonitrile, 2-pyrenecarbonitrile, 4-pyrenecarbonitrile, 1-ethynylpyrene, 2-ethynylpyrene, and 4-ethynylpyrene.

| TM+LR                     |            |            |           |
|---------------------------|------------|------------|-----------|
| <b>1-Cyanonaphthalene</b> |            |            |           |
| C                         | 0.0000000  | 0.2728740  | 0.0000000 |
| C                         | -0.3430370 | 1.6456640  | 0.0000000 |
| C                         | -1.6598090 | 2.0299460  | 0.0000000 |
| C                         | -2.6896240 | 1.0636170  | 0.0000000 |
| C                         | -2.3823370 | -0.2722970 | 0.0000000 |
| C                         | -1.0329270 | -0.7027400 | 0.0000000 |
| C                         | -0.6918050 | -2.0771400 | 0.0000000 |
| C                         | 0.6196740  | -2.4794530 | 0.0000000 |
| C                         | 1.6531480  | -1.5238010 | 0.0000000 |
| C                         | 1.3524220  | -0.1786050 | 0.0000000 |
| H                         | 0.4442640  | 2.3851060  | 0.0000000 |
| H                         | -1.9124510 | 3.0795690  | 0.0000000 |
| H                         | -3.7212210 | 1.3819610  | 0.0000000 |
| H                         | -3.1655610 | -1.0169260 | 0.0000000 |
| H                         | -1.4871740 | -2.8089300 | 0.0000000 |
| H                         | 0.8681310  | -3.5295610 | 0.0000000 |
| H                         | 2.6856380  | -1.8375220 | 0.0000000 |
| C                         | 2.4135950  | 0.7821190  | 0.0000000 |
| N                         | 3.2646530  | 1.5693140  | 0.0000000 |
| <b>2-Cyanonaphthalene</b> |            |            |           |
| C                         | 0.7064530  | -0.3376030 | 0.0000000 |
| C                         | 1.9185300  | -1.0713720 | 0.0000000 |
| C                         | 1.9018570  | -2.4420300 | 0.0000000 |
| C                         | 0.6732270  | -3.1404170 | 0.0000000 |
| C                         | -0.5148380 | -2.4552070 | 0.0000000 |
| C                         | -0.5301070 | -1.0398100 | 0.0000000 |
| C                         | -1.7408790 | -0.3028100 | 0.0000000 |
| C                         | -1.7335010 | 1.0652010  | 0.0000000 |
| C                         | -0.4977400 | 1.7627670  | 0.0000000 |
| C                         | 0.6954640  | 1.0752580  | 0.0000000 |
| H                         | 2.8553860  | -0.5326760 | 0.0000000 |
| H                         | 2.8295410  | -2.9942050 | 0.0000000 |
| H                         | 0.6740010  | -4.2201060 | 0.0000000 |
| H                         | -1.4553000 | -2.9876430 | 0.0000000 |
| H                         | -2.6789170 | -0.8391600 | 0.0000000 |
| H                         | -2.6554540 | 1.6254480  | 0.0000000 |
| H                         | 1.6305660  | 1.6160320  | 0.0000000 |
| C                         | -0.4977400 | 3.1950670  | 0.0000000 |
| N                         | -0.4977400 | 4.3540070  | 0.0000000 |
| <b>9-Cyanoanthracene</b>  |            |            |           |

|   |           |            |            |
|---|-----------|------------|------------|
| C | 0.0000000 | 0.0000000  | -1.7857490 |
| C | 0.0000000 | 0.0000000  | 1.0077510  |
| C | 0.0000000 | 1.2191730  | -1.1077790 |
| C | 0.0000000 | -1.2191730 | -1.1077790 |
| C | 0.0000000 | 1.2294560  | 0.3233770  |
| C | 0.0000000 | -1.2294560 | 0.3233770  |
| C | 0.0000000 | 2.4623990  | -1.8056390 |
| C | 0.0000000 | -2.4623990 | -1.8056390 |
| C | 0.0000000 | 2.4814340  | 1.0020620  |
| C | 0.0000000 | -2.4814340 | 1.0020620  |
| C | 0.0000000 | 3.6440400  | -1.1243010 |
| C | 0.0000000 | -3.6440400 | -1.1243010 |
| C | 0.0000000 | 3.6510630  | 0.2973930  |
| C | 0.0000000 | -3.6510630 | 0.2973930  |
| H | 0.0000000 | 2.4475080  | -2.8862370 |
| H | 0.0000000 | -2.4475080 | -2.8862370 |
| H | 0.0000000 | 2.4913710  | 2.0820160  |
| H | 0.0000000 | -2.4913710 | 2.0820160  |
| H | 0.0000000 | 4.5806300  | -1.6612690 |
| H | 0.0000000 | -4.5806300 | -1.6612690 |
| H | 0.0000000 | 4.5938800  | 0.8235560  |
| H | 0.0000000 | -4.5938800 | 0.8235560  |
| H | 0.0000000 | 0.0000000  | -2.8679490 |
| C | 0.0000000 | 0.0000000  | 2.4367510  |
| N | 0.0000000 | 0.0000000  | 3.5968510  |

**9-Cyanophenantrene**

|   |            |            |           |
|---|------------|------------|-----------|
| N | -3.5961200 | -2.3100000 | 0.0000000 |
| C | -2.5646740 | -1.7807600 | 0.0000000 |
| C | -1.2973400 | -1.1152640 | 0.0000000 |
| C | -0.1529690 | -1.8541850 | 0.0000000 |
| C | 1.1265710  | -1.2258320 | 0.0000000 |
| C | 1.2177900  | 0.1869270  | 0.0000000 |
| C | 2.2989160  | -2.0101260 | 0.0000000 |
| C | 3.5398760  | -1.4184410 | 0.0000000 |
| C | 3.6378730  | -0.0178650 | 0.0000000 |
| C | 2.5035130  | 0.7646880  | 0.0000000 |
| C | 0.0000000  | 0.9762100  | 0.0000000 |
| C | -1.2568660 | 0.3252680  | 0.0000000 |
| C | -2.4444630 | 1.0829280  | 0.0000000 |
| C | -2.3981290 | 2.4579480  | 0.0000000 |
| C | -1.1575300 | 3.1123190  | 0.0000000 |
| C | 0.0128210  | 2.3860210  | 0.0000000 |
| H | -0.2078390 | -2.9330910 | 0.0000000 |
| H | 2.2036580  | -3.0867200 | 0.0000000 |
| H | 4.4332900  | -2.0241770 | 0.0000000 |
| H | 4.6099000  | 0.4523800  | 0.0000000 |
| H | 2.6149170  | 1.8366150  | 0.0000000 |
| H | 0.9512850  | 2.9158540  | 0.0000000 |
| H | -1.1171950 | 4.1912650  | 0.0000000 |
| H | -3.3133530 | 3.0301980  | 0.0000000 |

|                                |            |            |           |
|--------------------------------|------------|------------|-----------|
| H                              | -3.3941600 | 0.5686570  | 0.0000000 |
| <b><i>trans</i> 2-Naphthol</b> |            |            |           |
| C                              | 0.0000000  | 0.6858600  | 0.0000000 |
| C                              | -0.6416240 | 1.9503930  | 0.0000000 |
| C                              | -2.0098170 | 2.0426560  | 0.0000000 |
| C                              | -2.8080570 | 0.8762460  | 0.0000000 |
| C                              | -2.2156540 | -0.3602700 | 0.0000000 |
| C                              | -0.8052090 | -0.4867010 | 0.0000000 |
| C                              | -0.1635570 | -1.7478550 | 0.0000000 |
| C                              | 1.2034110  | -1.8433600 | 0.0000000 |
| C                              | 1.9962750  | -0.6729260 | 0.0000000 |
| C                              | 1.4084970  | 0.5662390  | 0.0000000 |
| H                              | -0.0330350 | 2.8436810  | 0.0000000 |
| H                              | -2.4837940 | 3.0130920  | 0.0000000 |
| H                              | -3.8842440 | 0.9632770  | 0.0000000 |
| H                              | -2.8189000 | -1.2575370 | 0.0000000 |
| H                              | -0.7671010 | -2.6445600 | 0.0000000 |
| H                              | 1.6835620  | -2.8131000 | 0.0000000 |
| H                              | 2.0296890  | 1.4497100  | 0.0000000 |
| O                              | 3.3582280  | -0.7438870 | 0.0000000 |
| H                              | 3.6224110  | -1.6651570 | 0.0000000 |
| <b><i>cis</i> 1-Naphthol</b>   |            |            |           |
| C                              | 0.0000000  | 0.4420180  | 0.0000000 |
| C                              | 0.9909860  | 1.4552730  | 0.0000000 |
| C                              | 2.3262440  | 1.1398850  | 0.0000000 |
| C                              | 2.7373340  | -0.2099020 | 0.0000000 |
| C                              | 1.8013280  | -1.2111200 | 0.0000000 |
| C                              | 0.4144030  | -0.9207300 | 0.0000000 |
| C                              | -0.5539450 | -1.9522140 | 0.0000000 |
| C                              | -1.8890020 | -1.6399000 | 0.0000000 |
| C                              | -2.3163120 | -0.2986230 | 0.0000000 |
| C                              | -1.3964480 | 0.7208150  | 0.0000000 |
| H                              | 0.7170220  | 2.5019110  | 0.0000000 |
| H                              | 3.0649530  | 1.9271880  | 0.0000000 |
| H                              | 3.7899500  | -0.4497680 | 0.0000000 |
| H                              | 2.1096030  | -2.2471280 | 0.0000000 |
| H                              | -0.2249780 | -2.9808930 | 0.0000000 |
| H                              | -2.6297040 | -2.4256030 | 0.0000000 |
| H                              | -3.3663590 | -0.0503420 | 0.0000000 |
| O                              | -1.8755320 | 1.9949200  | 0.0000000 |
| H                              | -1.1437580 | 2.6122710  | 0.0000000 |
| <b>3-Cyanopyridine</b>         |            |            |           |
| N                              | -0.0242040 | 3.1771610  | 0.0000000 |
| C                              | -0.0242040 | 2.0187610  | 0.0000000 |
| C                              | -0.0242040 | 0.5877010  | 0.0000000 |
| C                              | 1.1850910  | -0.1135340 | 0.0000000 |
| N                              | 1.2571350  | -1.4417810 | 0.0000000 |
| C                              | 0.1059730  | -2.1194150 | 0.0000000 |
| C                              | -1.1468360 | -1.5152050 | 0.0000000 |
| C                              | -1.2184110 | -0.1322550 | 0.0000000 |

|   |            |            |           |
|---|------------|------------|-----------|
| H | 2.1216140  | 0.4271600  | 0.0000000 |
| H | 0.1919050  | -3.1974960 | 0.0000000 |
| H | -2.0419920 | -2.1180060 | 0.0000000 |
| H | -2.1664940 | 0.3843600  | 0.0000000 |

**2-Ethynylpyridine**

|   |            |            |           |
|---|------------|------------|-----------|
| H | 0.0105600  | 4.2542490  | 0.0000000 |
| C | 0.0105600  | 3.1925490  | 0.0000000 |
| C | 0.0105600  | 1.9858490  | 0.0000000 |
| C | 0.0105600  | 0.5516890  | 0.0000000 |
| N | 1.2054760  | -0.0600400 | 0.0000000 |
| C | 1.2061970  | -1.3927400 | 0.0000000 |
| C | 0.0535340  | -2.1718970 | 0.0000000 |
| C | -1.1766570 | -1.5286780 | 0.0000000 |
| C | -1.2023810 | -0.1427170 | 0.0000000 |
| H | 2.1815930  | -1.8610620 | 0.0000000 |
| H | 0.1252220  | -3.2491140 | 0.0000000 |
| H | -2.0977190 | -2.0933980 | 0.0000000 |
| H | -2.1322200 | 0.4052680  | 0.0000000 |

*cis* **3-Hydroxy-pyridine**

|   |            |            |           |
|---|------------|------------|-----------|
| H | -0.8920870 | 2.6001040  | 0.0000000 |
| O | 0.0118670  | 2.2783800  | 0.0000000 |
| C | 0.0000000  | 0.9185320  | 0.0000000 |
| C | -1.1774820 | 0.1732960  | 0.0000000 |
| N | -1.2031780 | -1.1588570 | 0.0000000 |
| C | -0.0330110 | -1.7995840 | 0.0000000 |
| C | 1.1923460  | -1.1402110 | 0.0000000 |
| C | 1.2154490  | 0.2456960  | 0.0000000 |
| H | -2.1381180 | 0.6781110  | 0.0000000 |
| H | -0.0785610 | -2.8796240 | 0.0000000 |
| H | 2.1129610  | -1.7048960 | 0.0000000 |
| H | 2.1392940  | 0.8048880  | 0.0000000 |

**4-Hydroxy-pyridine**

|   |            |            |           |
|---|------------|------------|-----------|
| H | -0.8446470 | 2.6315180  | 0.0000000 |
| O | 0.0493340  | 2.2833120  | 0.0000000 |
| C | 0.0000000  | 0.9301110  | 0.0000000 |
| C | -1.1893480 | 0.2099280  | 0.0000000 |
| C | -1.1179620 | -1.1776370 | 0.0000000 |
| N | 0.0209060  | -1.8722850 | 0.0000000 |
| C | 1.1505090  | -1.1555530 | 0.0000000 |
| C | 1.2017700  | 0.2298990  | 0.0000000 |
| H | -2.1486100 | 0.7098180  | 0.0000000 |
| H | -2.0309910 | -1.7584290 | 0.0000000 |
| H | 2.0714290  | -1.7233680 | 0.0000000 |
| H | 2.1419880  | 0.7594710  | 0.0000000 |

*cis* **Benzoic acid**

|   |            |            |           |
|---|------------|------------|-----------|
| C | 0.2608950  | -2.5878110 | 0.0000000 |
| C | 1.3974620  | -1.7829330 | 0.0000000 |
| C | -1.0047130 | -2.0094440 | 0.0000000 |
| C | 1.2686180  | -0.4013280 | 0.0000000 |
| C | -1.1390380 | -0.6264520 | 0.0000000 |



|   |            |            |           |
|---|------------|------------|-----------|
| C | 0.0000000  | 0.1791130  | 0.0000000 |
| C | -0.0857470 | 1.6591320  | 0.0000000 |
| O | 0.8614480  | 2.4051430  | 0.0000000 |
| O | -1.3583170 | 2.1127460  | 0.0000000 |
| H | -1.2929870 | 3.0745300  | 0.0000000 |
| H | 2.1344640  | 0.2421940  | 0.0000000 |
| H | -2.1161600 | -0.1713680 | 0.0000000 |
| H | 2.3788070  | -2.2324510 | 0.0000000 |
| H | -1.8849240 | -2.6343830 | 0.0000000 |
| H | 0.3617290  | -3.6629930 | 0.0000000 |

**1-Ethynyl-naphthalene**

|   |            |            |           |
|---|------------|------------|-----------|
| C | 0.2017980  | 0.1638750  | 0.0000000 |
| C | 1.4554400  | 0.8207290  | 0.0000000 |
| C | 2.6221150  | 0.0987500  | 0.0000000 |
| C | 2.5908190  | -1.3129030 | 0.0000000 |
| C | 1.3898180  | -1.9739360 | 0.0000000 |
| C | 0.1677870  | -1.2572230 | 0.0000000 |
| C | -1.0807790 | -1.9249480 | 0.0000000 |
| C | -2.2534640 | -1.2139300 | 0.0000000 |
| C | -2.2310520 | 0.1936920  | 0.0000000 |
| C | -1.0339430 | 0.8816320  | 0.0000000 |
| H | 1.4766140  | 1.8999210  | 0.0000000 |
| H | 3.5721330  | 0.6120090  | 0.0000000 |
| H | 3.5160840  | -1.8695470 | 0.0000000 |
| H | 1.3575640  | -3.0544540 | 0.0000000 |
| H | -1.0937600 | -3.0057700 | 0.0000000 |
| H | -3.2023180 | -1.7289180 | 0.0000000 |
| H | -3.1562960 | 0.7495950  | 0.0000000 |
| C | -1.0339430 | 2.3094020  | 0.0000000 |
| C | -1.0339430 | 3.5178020  | 0.0000000 |
| H | -1.0339430 | 4.5795020  | 0.0000000 |

**2-Ethynyl-naphthalene**

|   |            |            |           |
|---|------------|------------|-----------|
| C | 0.7039260  | -0.3593180 | 0.0000000 |
| C | 1.9126010  | -1.0992930 | 0.0000000 |
| C | 1.8923450  | -2.4703430 | 0.0000000 |
| C | 0.6619920  | -3.1653840 | 0.0000000 |
| C | -0.5231110 | -2.4744660 | 0.0000000 |
| C | -0.5335110 | -1.0591040 | 0.0000000 |
| C | -1.7395240 | -0.3146100 | 0.0000000 |
| C | -1.7228140 | 1.0533880  | 0.0000000 |
| C | -0.4880460 | 1.7580700  | 0.0000000 |
| C | 0.6976380  | 1.0541390  | 0.0000000 |
| H | 2.8516980  | -0.5640900 | 0.0000000 |
| H | 2.8188430  | -3.0249330 | 0.0000000 |
| H | 0.6587670  | -4.2451790 | 0.0000000 |
| H | -1.4659900 | -3.0031810 | 0.0000000 |
| H | -2.6810070 | -0.8456040 | 0.0000000 |
| H | -2.6438110 | 1.6159160  | 0.0000000 |
| H | 1.6371160  | 1.5878630  | 0.0000000 |
| C | -0.4880460 | 3.1863400  | 0.0000000 |

|   |            |           |           |
|---|------------|-----------|-----------|
| C | -0.4880460 | 4.3944400 | 0.0000000 |
| H | -0.4880460 | 5.4560400 | 0.0000000 |

**2-Quinolinecarbonitrile**

|   |            |            |           |
|---|------------|------------|-----------|
| N | 0.6511790  | 1.0248640  | 0.0000000 |
| C | -0.5266920 | 1.6140240  | 0.0000000 |
| C | -1.7693470 | 0.9355720  | 0.0000000 |
| C | -1.7578030 | -0.4321790 | 0.0000000 |
| C | -0.5221970 | -1.1153630 | 0.0000000 |
| C | -0.4227850 | -2.5270670 | 0.0000000 |
| C | 0.8073000  | -3.1318050 | 0.0000000 |
| C | 1.9887860  | -2.3536870 | 0.0000000 |
| C | 1.9232570  | -0.9847550 | 0.0000000 |
| C | 0.6659070  | -0.3341560 | 0.0000000 |
| H | -2.6882620 | 1.5013040  | 0.0000000 |
| H | -2.6813530 | -0.9947450 | 0.0000000 |
| H | -1.3284910 | -3.1166490 | 0.0000000 |
| H | 0.8794420  | -4.2089920 | 0.0000000 |
| H | 2.9490240  | -2.8471250 | 0.0000000 |
| H | 2.8100750  | -0.3701040 | 0.0000000 |
| C | -0.5266920 | 3.0574240  | 0.0000000 |
| N | -0.5266920 | 4.2153240  | 0.0000000 |

**3-Quinolinecarbonitrile**

|   |            |            |           |
|---|------------|------------|-----------|
| N | -1.7063540 | -0.2963800 | 0.0000000 |
| C | -1.6144380 | 1.0085860  | 0.0000000 |
| C | -0.3785520 | 1.7127230  | 0.0000000 |
| C | 0.7953710  | 0.9983490  | 0.0000000 |
| C | 0.7350740  | -0.4091600 | 0.0000000 |
| C | 1.8938730  | -1.2229430 | 0.0000000 |
| C | 1.7750930  | -2.5882860 | 0.0000000 |
| C | 0.4976340  | -3.1942670 | 0.0000000 |
| C | -0.6407230 | -2.4287750 | 0.0000000 |
| C | -0.5485840 | -1.0184810 | 0.0000000 |
| H | -2.5399200 | 1.5700940  | 0.0000000 |
| H | 1.7508190  | 1.5044250  | 0.0000000 |
| H | 2.8663210  | -0.7515020 | 0.0000000 |
| H | 2.6590860  | -3.2078630 | 0.0000000 |
| H | 0.4217540  | -4.2712970 | 0.0000000 |
| H | -1.6249390 | -2.8709960 | 0.0000000 |
| C | -0.3785520 | 3.1427230  | 0.0000000 |
| N | -0.3785520 | 4.3015230  | 0.0000000 |

**4-Quinolinecarbonitrile**

|   |            |            |           |
|---|------------|------------|-----------|
| N | -0.9392080 | -1.9796680 | 0.0000000 |
| C | 0.2853930  | -2.4549570 | 0.0000000 |
| C | 1.4470820  | -1.6546120 | 0.0000000 |
| C | 1.3027900  | -0.2877060 | 0.0000000 |
| C | 0.0000000  | 0.2792250  | 0.0000000 |
| C | -0.2418240 | 1.6722920  | 0.0000000 |
| C | -1.5300250 | 2.1426900  | 0.0000000 |
| C | -2.6224130 | 1.2459710  | 0.0000000 |
| C | -2.4118360 | -0.1086600 | 0.0000000 |

|   |            |            |           |
|---|------------|------------|-----------|
| C | -1.0950970 | -0.6259340 | 0.0000000 |
| H | 0.3844690  | -3.5328130 | 0.0000000 |
| H | 2.4260220  | -2.1091060 | 0.0000000 |
| H | 0.5960350  | 2.3540730  | 0.0000000 |
| H | -1.7130590 | 3.2065600  | 0.0000000 |
| H | -3.6293980 | 1.6352230  | 0.0000000 |
| H | -3.2285490 | -0.8137990 | 0.0000000 |
| C | 2.4540130  | 0.5646170  | 0.0000000 |
| N | 3.3778090  | 1.2640360  | 0.0000000 |

**9-Ethynylanthracene**

|   |            |            |           |
|---|------------|------------|-----------|
| C | 1.8027010  | 0.0000050  | 0.0000000 |
| C | -1.0084990 | 0.0000050  | 0.0000000 |
| C | 1.1213130  | -1.2168020 | 0.0000000 |
| C | 1.1213130  | 1.2168120  | 0.0000000 |
| C | -0.3103170 | -1.2255780 | 0.0000000 |
| C | -0.3103170 | 1.2255880  | 0.0000000 |
| C | 1.8196330  | -2.4601140 | 0.0000000 |
| C | 1.8196330  | 2.4601240  | 0.0000000 |
| C | -0.9837900 | -2.4808210 | 0.0000000 |
| C | -0.9837900 | 2.4808310  | 0.0000000 |
| C | 1.1413100  | -3.6434880 | 0.0000000 |
| C | 1.1413100  | 3.6434980  | 0.0000000 |
| C | -0.2801930 | -3.6513290 | 0.0000000 |
| C | -0.2801930 | 3.6513390  | 0.0000000 |
| H | 2.9005060  | -2.4435450 | 0.0000000 |
| H | 2.9005060  | 2.4435550  | 0.0000000 |
| H | -2.0629640 | -2.4882270 | 0.0000000 |
| H | -2.0629640 | 2.4882370  | 0.0000000 |
| H | 1.6803810  | -4.5791010 | 0.0000000 |
| H | 1.6803810  | 4.5791110  | 0.0000000 |
| H | -0.8062230 | -4.5944490 | 0.0000000 |
| H | -0.8062230 | 4.5944590  | 0.0000000 |
| H | 2.8849010  | -0.0000330 | 0.0000000 |
| C | -2.4339990 | -0.0000200 | 0.0000000 |
| C | -3.6432990 | -0.0000410 | 0.0000000 |
| H | -4.7051990 | -0.0000600 | 0.0000000 |

**9-Ethynylphenanthrene**

|   |            |            |           |
|---|------------|------------|-----------|
| H | 0.3793340  | 5.3661750  | 0.0000000 |
| C | 0.3793340  | 4.3043750  | 0.0000000 |
| C | 0.3793340  | 3.0958750  | 0.0000000 |
| C | 0.3793340  | 1.6682750  | 0.0000000 |
| C | 1.5621210  | 0.9885270  | 0.0000000 |
| C | 1.6061100  | -0.4365940 | 0.0000000 |
| C | 0.4021150  | -1.1801680 | 0.0000000 |
| C | 2.8470370  | -1.1077560 | 0.0000000 |
| C | 2.9054830  | -2.4816140 | 0.0000000 |
| C | 1.7142530  | -3.2247060 | 0.0000000 |
| C | 0.4925080  | -2.5869160 | 0.0000000 |
| C | -0.8628230 | -0.4697080 | 0.0000000 |
| C | -0.8724250 | 0.9463870  | 0.0000000 |

|   |            |            |           |
|---|------------|------------|-----------|
| C | -2.1007680 | 1.6366450  | 0.0000000 |
| C | -3.2951680 | 0.9532280  | 0.0000000 |
| C | -3.2937610 | -0.4491710 | 0.0000000 |
| C | -2.1028550 | -1.1412520 | 0.0000000 |
| H | 2.4925940  | 1.5378000  | 0.0000000 |
| H | 3.7543170  | -0.5200460 | 0.0000000 |
| H | 3.8594470  | -2.9870740 | 0.0000000 |
| H | 1.7533340  | -4.3038980 | 0.0000000 |
| H | -0.4032210 | -3.1865310 | 0.0000000 |
| H | -2.1304710 | -2.2187980 | 0.0000000 |
| H | -4.2279180 | -0.9907600 | 0.0000000 |
| H | -4.2292670 | 1.4947170  | 0.0000000 |
| H | -2.0871210 | 2.7158590  | 0.0000000 |

**1-Pyrenecarbonitrile**

|   |            |            |           |
|---|------------|------------|-----------|
| C | 0.8763140  | 1.9863330  | 0.0000000 |
| C | 2.0350330  | 1.2789090  | 0.0000000 |
| C | 2.0357330  | -0.1532910 | 0.0000000 |
| C | 3.2208550  | -0.8959670 | 0.0000000 |
| C | 3.1861330  | -2.2849330 | 0.0000000 |
| C | 1.9715380  | -2.9600250 | 0.0000000 |
| C | 0.7638830  | -2.2549780 | 0.0000000 |
| C | -0.5050420 | -2.9205850 | 0.0000000 |
| C | -1.6671800 | -2.2191790 | 0.0000000 |
| C | -1.6676800 | -0.7868790 | 0.0000000 |
| C | -2.8571610 | -0.0487370 | 0.0000000 |
| C | -2.8315630 | 1.3347260  | 0.0000000 |
| C | -1.6125840 | 2.0181700  | 0.0000000 |
| C | -0.3908980 | 1.3190140  | 0.0000000 |
| C | 0.7920640  | -0.8359300 | 0.0000000 |
| C | -0.4248160 | -0.0998750 | 0.0000000 |
| H | 0.8937510  | 3.0662920  | 0.0000000 |
| H | 2.9850360  | 1.7945040  | 0.0000000 |
| H | 4.1683210  | -0.3759330 | 0.0000000 |
| H | 4.1099110  | -2.8440410 | 0.0000000 |
| H | 1.9506180  | -4.0407220 | 0.0000000 |
| H | -0.5192860 | -4.0014910 | 0.0000000 |
| H | -2.6177330 | -2.7335490 | 0.0000000 |
| H | -3.8035680 | -0.5698680 | 0.0000000 |
| H | -3.7512400 | 1.8994100  | 0.0000000 |
| C | -1.6125840 | 3.4482200  | 0.0000000 |
| N | -1.6125840 | 4.6079200  | 0.0000000 |

**2-Pyrenecarbonitrile**

|   |            |            |           |
|---|------------|------------|-----------|
| C | 2.9297100  | 0.0000110  | 0.0000000 |
| C | 2.2417930  | 1.2139430  | 0.0000000 |
| C | 2.2417930  | -1.2139220 | 0.0000000 |
| C | 0.8466900  | 1.2304570  | 0.0000000 |
| C | 0.8466900  | -1.2304360 | 0.0000000 |
| C | 0.1054540  | 2.4582590  | 0.0000000 |
| C | 0.1054540  | -2.4582380 | 0.0000000 |
| C | -1.2511440 | 2.4560450  | 0.0000000 |

|   |            |            |           |
|---|------------|------------|-----------|
| C | -1.2511440 | -2.4560240 | 0.0000000 |
| C | -1.9937100 | 1.2292810  | 0.0000000 |
| C | -1.9937100 | -1.2292600 | 0.0000000 |
| C | -3.3916300 | 1.2068620  | 0.0000000 |
| C | -3.3916300 | -1.2068410 | 0.0000000 |
| C | -4.0805190 | -0.0000760 | 0.0000000 |
| C | 0.1371410  | -0.0000210 | 0.0000000 |
| C | -1.2839970 | -0.0000640 | 0.0000000 |
| H | 2.7932390  | 2.1425470  | 0.0000000 |
| H | 2.7932390  | -2.1425260 | 0.0000000 |
| H | 0.6528260  | 3.3900840  | 0.0000000 |
| H | 0.6528260  | -3.3900630 | 0.0000000 |
| H | -1.7984040 | 3.3881670  | 0.0000000 |
| H | -1.7984040 | -3.3881460 | 0.0000000 |
| H | -3.9339880 | 2.1417290  | 0.0000000 |
| H | -3.9339880 | -2.1417080 | 0.0000000 |
| H | -5.1603190 | -0.0000760 | 0.0000000 |
| C | 4.3628100  | 0.0000110  | 0.0000000 |
| N | 5.5218100  | 0.0000110  | 0.0000000 |

**4-Pyrenecarbonitrile**

|   |            |            |           |
|---|------------|------------|-----------|
| C | 1.8796700  | -0.8846390 | 0.0000000 |
| C | 1.0166410  | -1.9412820 | 0.0000000 |
| C | -0.3969550 | -1.7396760 | 0.0000000 |
| C | -1.2931760 | -2.8139150 | 0.0000000 |
| C | -2.6631420 | -2.5865850 | 0.0000000 |
| C | -3.1624120 | -1.2893450 | 0.0000000 |
| C | -2.2998540 | -0.1884030 | 0.0000000 |
| C | -2.7850370 | 1.1607050  | 0.0000000 |
| C | -1.9288800 | 2.2130160  | 0.0000000 |
| C | -0.5084360 | 2.0170310  | 0.0000000 |
| C | 0.3881710  | 3.0899050  | 0.0000000 |
| C | 1.7589450  | 2.8681160  | 0.0000000 |
| C | 2.2676600  | 1.5747660  | 0.0000000 |
| C | 1.4029670  | 0.4776620  | 0.0000000 |
| C | -0.8982560 | -0.4114270 | 0.0000000 |
| C | 0.0000000  | 0.6912830  | 0.0000000 |
| H | 1.4034040  | -2.9500830 | 0.0000000 |
| H | -0.9075210 | -3.8234610 | 0.0000000 |
| H | -3.3454530 | -3.4233670 | 0.0000000 |
| H | -4.2299900 | -1.1201670 | 0.0000000 |
| H | -3.8534910 | 1.3236050  | 0.0000000 |
| H | -2.3067870 | 3.2257010  | 0.0000000 |
| H | 0.0012650  | 4.0990790  | 0.0000000 |
| H | 2.4384330  | 3.7071920  | 0.0000000 |
| H | 3.3351640  | 1.4102950  | 0.0000000 |
| C | 3.2906240  | -1.1253560 | 0.0000000 |
| N | 4.4362560  | -1.3028480 | 0.0000000 |

**1-Ethynylpyrene**

|   |           |           |           |
|---|-----------|-----------|-----------|
| C | 0.8895790 | 1.9648100 | 0.0000000 |
| C | 2.0445260 | 1.2510550 | 0.0000000 |

|   |            |            |           |
|---|------------|------------|-----------|
| C | 2.0363520  | -0.1811220 | 0.0000000 |
| C | 3.2164890  | -0.9318810 | 0.0000000 |
| C | 3.1726560  | -2.3204890 | 0.0000000 |
| C | 1.9533200  | -2.9869780 | 0.0000000 |
| C | 0.7501450  | -2.2739190 | 0.0000000 |
| C | -0.5227040 | -2.9322090 | 0.0000000 |
| C | -1.6796690 | -2.2223030 | 0.0000000 |
| C | -1.6709210 | -0.7902290 | 0.0000000 |
| C | -2.8534090 | -0.0420560 | 0.0000000 |
| C | -2.8167740 | 1.3412590  | 0.0000000 |
| C | -1.5978370 | 2.0294690  | 0.0000000 |
| C | -0.3844630 | 1.3102800  | 0.0000000 |
| C | 0.7870370  | -0.8544280 | 0.0000000 |
| C | -0.4253510 | -0.1089780 | 0.0000000 |
| H | 0.9108850  | 3.0440000  | 0.0000000 |
| H | 2.9982560  | 1.7601490  | 0.0000000 |
| H | 4.1674790  | -0.4178970 | 0.0000000 |
| H | 4.0927280  | -2.8860570 | 0.0000000 |
| H | 1.9247580  | -4.0676010 | 0.0000000 |
| H | -0.5434750 | -4.0130090 | 0.0000000 |
| H | -2.6339400 | -2.7301680 | 0.0000000 |
| H | -3.8041510 | -0.5560770 | 0.0000000 |
| H | -3.7345020 | 1.9096750  | 0.0000000 |
| C | -1.5978370 | 3.4559690  | 0.0000000 |
| C | -1.5978370 | 4.6636690  | 0.0000000 |
| H | -1.5978370 | 5.7254690  | 0.0000000 |

**2-Ethynylpyrene**

|   |            |            |           |
|---|------------|------------|-----------|
| C | -2.9298400 | 0.0000360  | 0.0000000 |
| C | -2.2297840 | -1.2095950 | 0.0000000 |
| C | -2.2297840 | 1.2096670  | 0.0000000 |
| C | -0.8346090 | -1.2282610 | 0.0000000 |
| C | -0.8346090 | 1.2283320  | 0.0000000 |
| C | -0.0924860 | -2.4559950 | 0.0000000 |
| C | -0.0924860 | 2.4560670  | 0.0000000 |
| C | 1.2644140  | -2.4555330 | 0.0000000 |
| C | 1.2644140  | 2.4556050  | 0.0000000 |
| C | 2.0084710  | -1.2294380 | 0.0000000 |
| C | 2.0084710  | 1.2295100  | 0.0000000 |
| C | 3.4064900  | -1.2069760 | 0.0000000 |
| C | 3.4064900  | 1.2070480  | 0.0000000 |
| C | 4.0955950  | -0.0000460 | 0.0000000 |
| C | -0.1226890 | 0.0000380  | 0.0000000 |
| C | 1.2983880  | 0.0000400  | 0.0000000 |
| H | -2.7786720 | -2.1401780 | 0.0000000 |
| H | -2.7786720 | 2.1402500  | 0.0000000 |
| H | -0.6400840 | -3.3879180 | 0.0000000 |
| H | -0.6400840 | 3.3879900  | 0.0000000 |
| H | 1.8108930  | -3.3883450 | 0.0000000 |
| H | 1.8108930  | 3.3884170  | 0.0000000 |
| H | 3.9488440  | -2.1420770 | 0.0000000 |

|                        |            |            |           |
|------------------------|------------|------------|-----------|
| H                      | 3.9488440  | 2.1421480  | 0.0000000 |
| H                      | 5.1755950  | -0.0000740 | 0.0000000 |
| C                      | -4.3589400 | -0.0001510 | 0.0000000 |
| C                      | -5.5658400 | -0.0003090 | 0.0000000 |
| H                      | -6.6275400 | -0.0004480 | 0.0000000 |
| <b>4-Ethynylpyrene</b> |            |            |           |
| C                      | 0.5503060  | 2.0042040  | 0.0000000 |
| C                      | 1.7335400  | 1.3212260  | 0.0000000 |
| C                      | 1.7775730  | -0.1061950 | 0.0000000 |
| C                      | 2.9886790  | -0.8070960 | 0.0000000 |
| C                      | 3.0002400  | -2.1960480 | 0.0000000 |
| C                      | 1.8085990  | -2.9114600 | 0.0000000 |
| C                      | 0.5767810  | -2.2486890 | 0.0000000 |
| C                      | -0.6699640 | -2.9563880 | 0.0000000 |
| C                      | -1.8525190 | -2.2914080 | 0.0000000 |
| C                      | -1.9015360 | -0.8582460 | 0.0000000 |
| C                      | -3.1127510 | -0.1599330 | 0.0000000 |
| C                      | -3.1273600 | 1.2283900  | 0.0000000 |
| C                      | -1.9389800 | 1.9493990  | 0.0000000 |
| C                      | -0.7075900 | 1.2892130  | 0.0000000 |
| C                      | 0.5567130  | -0.8298180 | 0.0000000 |
| C                      | -0.6817720 | -0.1304320 | 0.0000000 |
| H                      | 2.6638030  | 1.8710500  | 0.0000000 |
| H                      | 3.9176230  | -0.2544570 | 0.0000000 |
| H                      | 3.9422260  | -2.7241060 | 0.0000000 |
| H                      | 1.8245580  | -3.9923420 | 0.0000000 |
| H                      | -0.6489490 | -4.0371840 | 0.0000000 |
| H                      | -2.7863460 | -2.8361500 | 0.0000000 |
| H                      | -4.0406690 | -0.7144860 | 0.0000000 |
| H                      | -4.0701930 | 1.7549360  | 0.0000000 |
| H                      | -1.9558000 | 3.0286680  | 0.0000000 |
| C                      | 0.5503060  | 3.4316040  | 0.0000000 |
| C                      | 0.5503060  | 4.6389040  | 0.0000000 |
| H                      | 0.5503060  | 5.7007040  | 0.0000000 |

## Simulations of rotational spectra

Simulations of rotational spectra for the 13 systems of the "application" dataset (see main text) are provided as separate files in the PGOPHER format: 1-ethynyl-naphthalene.pgo, 2-ethynyl-naphthalene.pgo, 2-quinolinecarbonitrile.pgo, 3-quinolinecarbonitrile.pgo, 4-quinolinecarbonitrile.pgo, 9-ethynylanthracene.pgo, 9-ethynylphenanthrene.pgo, 1-pyrenecarbonitrile.pgo, 2-pyrenecarbonitrile.pgo, 4-pyrenecarbonitrile.pgo, 1-ethynylpyrene.pgo, 2-ethynylpyrene.pgo, and 4-ethynylpyrene.pgo.
